# Supplementary material for: Biocatalytic synthesis of oxadiazole thioethers and evaluation of their antitumor activity
Source: Royal Society of Chemistry journal article supplement (doi:10.1039/d2ob02307e), 2023-01-01
Supplement: d2ob02307e1.pdf [file d2ob02307e1.pdf]

The ESI for *Org. Biomol. Chem.*, 2023, **21**, DOI: 10.1039/D2OB02307E, originally published on 23rd May 2023, was updated on 30th May 2023.

## Supporting Information

### Biocatalytic synthesis of oxadiazole thioethers and evaluation of their antitumor activity

Negin Neissari <sup>a</sup>, Mansour Shahedi <sup>a</sup>, Zohreh Habibi <sup>a\*</sup>, Maryam Yousefi <sup>b</sup>, Arash Minai-Tehrani <sup>b</sup>, Fatemeh Yazdi Samadi <sup>b</sup>, Jesper Brask <sup>c</sup>, Hossein Bavandi <sup>a</sup>, Mehdi Mohammadi <sup>d\*\*</sup>

<sup>a</sup> Faculty of Chemistry and Petroleum Sciences, Shahid Beheshti University, 1983969411, Tehran, Iran. Email: Z\_habibi@sbu.ac.ir

<sup>b</sup> Nanobiotechnology Research Center, Avicenna Research Institute, ACECR, Tehran, Iran

<sup>c</sup> Novozymes A/S, Krogshøjvej 36, 2880 Bagsværd, Copenhagen, Denmark

<sup>d</sup> Bioprocess Engineering Department, Institute of Industrial and Environmental Biotechnology, National Institute of Genetic Engineering and Biotechnology (NIGEB), Tehran, Iran. Email: m.mohammadi@nigeb.ac.ir

### Table of Contents

|                                                                                                             |    |
|-------------------------------------------------------------------------------------------------------------|----|
| 1. Experimental section .....                                                                               | 2  |
| 1.1. Chemistry .....                                                                                        | 2  |
| 1.2. Synthesis of 5-phenyl-1,3,4-oxadiazole-2-thiols (4a-c).....                                            | 2  |
| 1.3.1. Typical procedure for synthesis of 2,5-disubstituted-1,3,4-oxadiazole thioethers.....                | 3  |
| 1.3.2. Structure-characterization of compound 7c.....                                                       | 3  |
| 1.4. Anti-proliferation assay.....                                                                          | 4  |
| 1.5. Computational methods .....                                                                            | 4  |
| 1.5.1. ADME prediction.....                                                                                 | 4  |
| 1.5.2. Molecular modeling.....                                                                              | 5  |
| 2. Characterization data of compounds 7a-l:.....                                                            | 6  |
| 3. Spectral data of compounds 7a-l ( <sup>1</sup> H NMR, <sup>13</sup> C NMR, and mass spectrometry): ..... | 12 |
| 4. References .....                                                                                         | 48 |

## 1. Experimental section

### 1.1. Chemistry

All chemicals and reagents used in the current study were of analytical grade. Novozym 435 was a generous gift from Novozymes (Denmark). Porcine pancreas lipase, *Thermomyces lanuginosus* lipase, *Aspergillus niger* lipase, and bovine serum albumin (BSA) were purchased from Sigma-Aldrich. Progress of the reactions was monitored by thin layer chromatography (TLC, performed on pre-coated Merck silica gel 60 F<sub>254</sub> plates). The compounds were purified by preparative TLC (home-made plates 20\*20 cm with silica gel 60 F<sub>254</sub>, Merck) using a mixture of ethyl acetate and *n*-hexane as a mobile phase. <sup>1</sup>H NMR and <sup>13</sup>C NMR spectra were recorded on a Bruker Avance spectrometer (300 MHz and 75 MHz, respectively) using CDCl<sub>3</sub> and DMSO-*d*<sub>6</sub> with TMS as internal reference. Melting points were determined on a Thermo Scientific 9100 apparatus. Mass spectra were recorded via an Agilent Technologies (HP) 5973 mass spectrometer.

### 1.2. Synthesis of 5-phenyl-1,3,4-oxadiazole-2-thiols (4a-c)

The 5-phenyl-1,3,4-oxadiazole-2-thiols (**4a-c**) were synthesized according to previous reports<sup>1-3</sup> with some modifications (Scheme 1). Exemplified with **4c**, a mixture of 4-methoxybenzoic acid (40 mmol, 4.4 mL), sulfuric acid 95-97% (5.2 mL), and methanol (60 mL) was heated to 80 °C under reflux for 24 h. Excess solvent was removed by vacuum evaporation, and an aqueous solution of saturated sodium bicarbonate was added to neutralize the acid. Then, the methyl benzoate product was extracted with ethyl acetate.

In the next step, the synthesized methyl 4-methoxybenzoate (30 mmol, 4.98 g) and excess hydrazine hydrate (90 mmol, 2.88 mL) was mixed with absolute ethanol (50 mL) and refluxed overnight. After completion of the reaction, the reaction mixture was concentrated to a reduced volume *in vacuo*, and the product subsequently recovered by filtration. Excess hydrazine was removed by washing the product on the filter with water.

Finally, the synthesized 4-methoxybenzohydrazide (18.3 mmol, 3.04 g), solubilized in a mixture of absolute ethanol and water (5:1), was reacted with carbon disulfide (36 mmol, 2.2 mL) in presence of potassium hydroxide (32 mmol, 1.8 g) at 90 °C under reflux for 24 h. After reducing the volume *in vacuo*, pH was adjusted to 2-3 with 1 M HCl. The formed precipitate was then collected by filtration and found to be pure by TLC (*n*-hexane/ethyl acetate, 8:1-6:1) and NMR analysis. Overall yield of 5-(4-nitrophenyl)-1,3,4-oxadiazole-2-thiol (**4c**) was 83%.

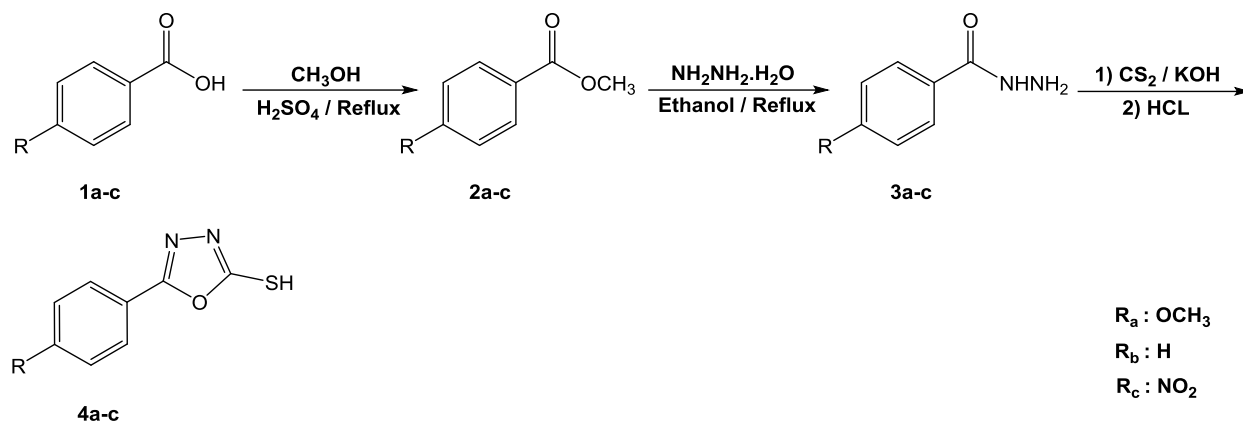

**Scheme 1.** Synthesis of 5-(4-methoxyphenyl)-1,3,4-oxadiazole-2-thiol (**4a**, 80%), 5-phenyl-1,3,4-oxadiazole-2-thiol (**4b**, 78%), and 5-(4-nitrophenyl)-1,3,4-oxadiazole-2-thiol (**4c**, 83%).

### 1.3.1. Typical procedure for synthesis of 2,5-disubstituted-1,3,4-oxadiazole thioethers

A reaction mixture containing 5-(4-methoxyphenyl)-1,3,4-oxadiazole-2-thiol (**4a**) (0.1 mmol, 0.02 g), 4-chlorobenzaldehyde (**5b**) (0.2 mmol, 0.028 g), ethyl butyryl acetate (**6a**) (0.2 mmol, 32  $\mu$ L), enzyme (30 mg Novozym 435), acetonitrile (485  $\mu$ L), H<sub>2</sub>O (15  $\mu$ L) and aniline (5  $\mu$ L) was stirred at room temperature. The reaction was incubated for 24 h and the progress was monitored using TLC (*n*-hexane/ethyl acetate, 8:1-6:1). Thereupon, the enzyme was filtered from the reaction, and the mixture was purified using preparative TLC (*n*-hexane/ethyl acetate, 8:1-6:1). Finally, the desired product **7c** was recrystallized from ethanol. Analytical data of all compounds are provided in the Supporting Information.

### 1.3.2. Structure-characterization of compound **7c**

The 1,3,4-oxadiazole thioether product (**7c**) was characterized by NMR spectroscopy (Figure 1). A doublet of doublets (dd) signal at  $\delta_{\text{H}} = 6.23$  ppm was assigned to the proton H<sub>a</sub> linked to the chiral center, whereas two signals at  $\delta_{\text{H}} = 3.2$  ppm and  $\delta_{\text{H}} = 3.6$  ppm indicated the two protons H<sub>b1</sub> and H<sub>b2</sub>. According to the splitting pattern and coupling constants of H<sub>a</sub> (dd,  $J = 8.7, 6.0$  Hz), it was concluded that the two diastereotopic protons were vicinal to H<sub>a</sub>; H<sub>b1</sub> (dd,  $J = 17.7, 8.7$  Hz) and H<sub>b2</sub> (dd,  $J = 17.7, 6.0$  Hz). The NMR spectra showed no ethyl ester signals, indicating that the ethyl ester part of the compound is converted to a carboxylic acid during the reaction, which

subsequently decarboxylates. As further confirmation, the mass spectrometry (MS) result corresponded to the theoretical molecular weight of compound **7c**.

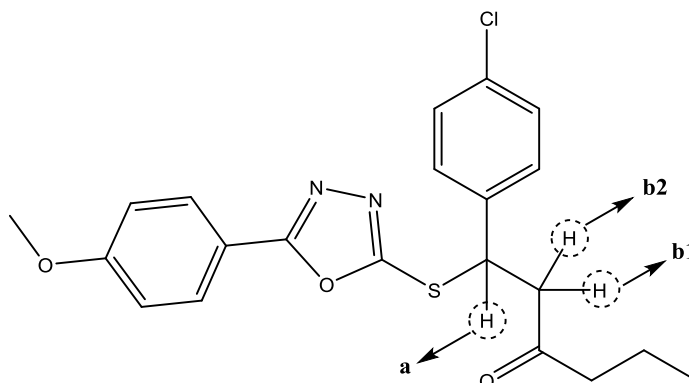

**Figure 1.** The 1,3,4-oxadiazole thioether product (**7c**).

#### 1.4. Anti-proliferation assay

To assess the cytotoxicity effects of the synthesized compounds, an MTT-based colorimetric assay was performed. In brief, HepG2 (human liver cancer) and HT-29 (human colorectal cancer) cell lines were cultured in appropriate media, supplemented with 5% of heat-activated fetal bovine serum (FBS), and penicillin/streptomycin. For the MTT assay, a proper number of cells was added to the 96-well plate. Following overnight incubation (at 37°C with 5% CO<sub>2</sub>), the synthesized compounds were added at different concentrations to the plate, including Doxorubicin as reference. The plate was further incubated for 48 h, before the MTT solution (0.5 mg/mL) was added to each well. The plate was finally incubated for approximately 2 h at 37 °C. Subsequently, the medium was discarded, and DMSO was added to each well to solubilize formed formazan crystals. The absorbance was measured using an ELISA plate reader at 570 nm. The data are presented as mean ± SEM. The IC<sub>50</sub> value is defined as the concentration at which the viability of the cells is reduced by 50%.

#### 1.5. Computational methods

##### 1.5.1. ADME prediction

*In silico* ADME properties of compounds **7f** and **7g** were studied using SwissADME (<http://www.swissadme.ch/>) to predict their physicochemical properties, lipophilicity, water solubility, pharmacokinetics, and drug-likeness.

### 1.5.2. Molecular modeling

Molecular docking studies were carried out using Maestro 11.5, available in the Schrödinger suites software (version 2018-1). The human thymidylate synthase crystal structure (PDB: 6QXG) was retrieved from Protein Data Bank. The protein structure was prepared by adding hydrogen atoms, bonds, and charges using the protein preparation wizard in Maestro. Crystallographic water molecules and other unnecessary hetero atoms were deleted. Then, the structure was minimized using an OPLS3 force field <sup>4</sup>. The receptor grid generation panel in Glide (Grid-based Ligand Docking with Energetics) was used to generate the grid box of the co-crystallized ligand defining the active site (x: 39.67, y: -33.85, z: 19.16). The 2D structures of the compounds were drawn and converted to 3D, which were subsequently refined by the LigPrep module in Maestro. Ligands with different chiralities were generated using an OPLS3 force field for energy minimization. Molecular docking calculation was conducted using the Glide application in extra precision (XP) mode without applying any constraints <sup>5</sup>. The co-crystallized ligand of the receptor was redocked into the TS binding pocket with a low RMSD (0.52 Å), validating the docking procedure.

## 2. Characterization data of compounds 7a-l:

### 1-**{[5-(4-methoxyphenyl)-1,3,4-oxadiazol-2-yl]sulfanyl}-1-phenylhexan-3-one:**

White powder (yield: 73%); mp: 103 °C; <sup>1</sup>H NMR (300 MHz, Chloroform-*d*) δ 7.90 – 7.81 (d, 2H), 7.52 (d, *J* = 7.0 Hz, 2H), 7.36 (q, *J* = 6.6 Hz, 3H), 7.02 – 6.95 (m, 2H), 6.27 (dt, *J* = 8.9, 4.2 Hz, 1H), 3.88 (d, *J* = 3.2 Hz, 3H), 3.68 – 3.56 (m, 1H), 3.22 (dd, *J* = 17.4, 5.4 Hz, 1H), 2.45 (q, *J* = 5.4, 3.4 Hz, 2H), 1.60 (q, *J* = 10.7, 9.0 Hz, 2H), 0.91 – 0.83 (m, 3H). <sup>13</sup>C NMR (75 MHz, Chloroform-*d*) δ 210.8, 180.3, 167.5, 164.1, 141.8, 133.5, 133.3, 133.0, 132.1, 119.6, 119.3, 62.3, 60.2, 50.8, 49.6, 21.8, 18.3. MS (EI, *m/z*) = 382.3 [*M*]<sup>+</sup> (calculated: 382.5). Anal. Calcd for C<sub>21</sub>H<sub>22</sub>N<sub>2</sub>O<sub>3</sub>S: C = 65.95, H = 5.80, N = 7.32; Found: C = 65.91, H = 5.86, N = 7.28.

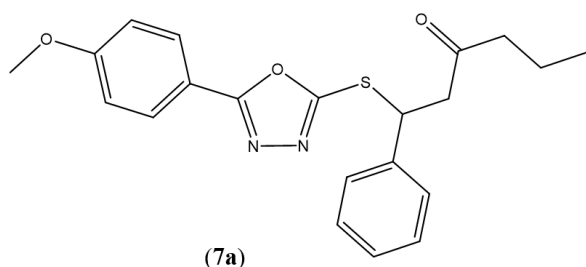

### 1-phenyl-1-**{[5-phenyl-1,3,4-oxadiazol-2-yl]sulfanyl}hexan-3-one:**

White powder (yield: 70%); mp: 81 °C; <sup>1</sup>H NMR (300 MHz, Chloroform-*d*) δ 7.99 – 7.90 (m, 2H), 7.53 (dq, *J* = 8.0, 3.3, 2.2 Hz, 5H), 7.37 (q, *J* = 7.5, 7.0 Hz, 3H), 6.29 (dd, *J* = 9.2, 5.5 Hz, 1H), 3.66 (dd, *J* = 17.6, 9.2 Hz, 1H), 3.23 (dd, *J* = 17.6, 5.6 Hz, 1H), 2.46 (t, *J* = 7.2 Hz, 2H), 1.62 (p, *J* = 7.3 Hz, 2H), 0.88 (t, *J* = 7.4 Hz, 3H). <sup>13</sup>C NMR (75 MHz, Chloroform-*d*) δ 206.1, 175.9, 159.3, 137.0, 132.3, 129.1, 128.9, 128.7, 127.4, 126.4, 122.5, 57.7, 46.1, 44.9, 17.1, 13.6. MS (EI, *m/z*) = 352.2 [*M*]<sup>+</sup> (calculated: 352.5). Anal. Calcd for C<sub>20</sub>H<sub>20</sub>N<sub>2</sub>O<sub>2</sub>S: C = 68.16, H = 5.72, N = 7.95; Found: C = 68.19, H = 5.72, N = 7.91.

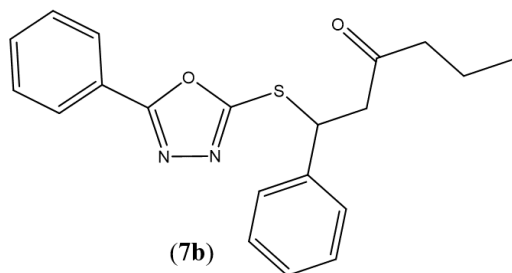

### 1-(4-chlorophenyl)-1-[[5-(4-methoxyphenyl)-1,3,4-oxadiazol-2-yl]sulfanyl]hexan-3-one:

White crystal (yield: 78%); mp: 97 °C;  $^1\text{H NMR}$  (300 MHz, Chloroform-*d*)  $\delta$  7.88 – 7.81 (m, 2H), 7.46 (d,  $J = 8.5$  Hz, 2H), 7.35 – 7.27 (m, 2H), 7.01 – 6.93 (m, 2H), 6.23 (dd,  $J = 8.7, 6.0$  Hz, 1H), 3.88 (s, 3H), 3.60 (dd,  $J = 17.7, 8.7$  Hz, 1H), 3.21 (dd,  $J = 17.7, 6.0$  Hz, 1H), 2.45 (td,  $J = 7.2, 1.9$  Hz, 2H), 1.60 (q,  $J = 7.3$  Hz, 2H), 0.86 (d,  $J = 7.4$  Hz, 3H).  $^{13}\text{CNMR}$  (75 MHz, Chloroform-*d*)  $\delta$  205.8, 175.6, 162.9, 159.5, 135.5, 134.6, 129.0, 128.9, 128.3, 114.7, 114.6, 56.9, 55.6, 46.0, 44.9, 17.1, 13.6. MS (EI,  $m/z$ ) = 416.2  $[\text{M}]^+$  (calculated: 416.9). Anal. Calcd for  $\text{C}_{21}\text{H}_{21}\text{ClN}_2\text{O}_3\text{S}$ : C = 60.50, H = 5.08, N = 6.72; Found: C = 60.43, H = 5.12, N = 6.79.

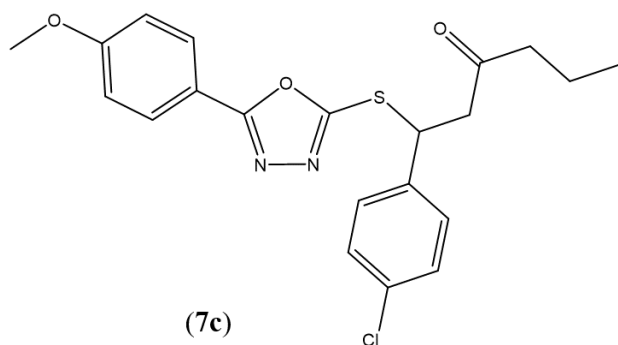

### 4-(2-nitrophenyl)-4-[[5-phenyl-1,3,4-oxadiazol-2-yl]sulfanyl]butan-2-one:

White powder (yield: 82%); mp: 193 °C;  $^1\text{HNMR}$  (300 MHz, Chloroform-*d*)  $\delta$  8.04 (d,  $J = 8.1$  Hz, 1H), 7.95 (d,  $J = 7.4$  Hz, 2H), 7.64 – 7.45 (m, 6H), 6.70 (dd,  $J = 11.0, 3.1$  Hz, 1H), 3.77 (dd,  $J = 17.9, 10.9$  Hz, 1H), 3.31 (dd,  $J = 17.7, 3.1$  Hz, 1H), 2.29 (s, 3H).  $^{13}\text{CNMR}$  (75 MHz, Chloroform-*d*)  $\delta$  202.8, 176.3, 159.3, 148.4, 133.9, 133.4, 132.6, 129.2, 128.0, 126.5, 125.0, 122.3, 54.2, 46.8, 29.7. MS (EI,  $m/z$ ) = 369.1  $[\text{M}]^+$  (calculated: 369.4). Anal. Calcd for  $\text{C}_{18}\text{H}_{15}\text{N}_3\text{O}_4\text{S}$ : C = 58.53, H = 4.09, N = 11.38; Found: C = 58.47, H = 4.21, N = 11.41.

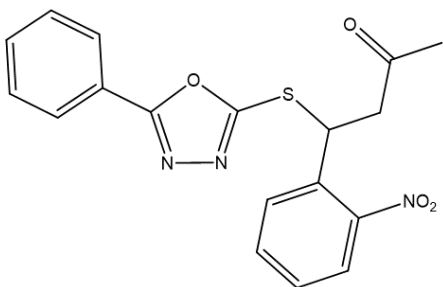

(7d)

#### 4-[[5-(4-methoxyphenyl)-1,3,4-oxadiazol-2-yl]sulfanyl]-4-phenylbutan-2-one:

Brownish powder (yield: 72%); mp: 95 °C;  $^1\text{H}$ NMR (300 MHz, Chloroform-*d*)  $\delta$  7.90 – 7.84 (m, 2H), 7.57 – 7.50 (m, 2H), 7.41 – 7.32 (m, 3H), 7.02 – 6.96 (m, 2H), 6.26 (dd,  $J = 8.5, 5.5$  Hz, 1H), 3.89 (s, 3H), 3.67 (dd,  $J = 17.5, 8.9$  Hz, 1H), 3.32 – 3.19 (m, 1H), 2.23 (s, 3H).  $^{13}\text{C}$ NMR (75 MHz, DMSO-*d*<sub>6</sub>)  $\delta$  205.3, 175.4, 163.0, 159.4, 137.9, 129.2, 128.7, 127.4, 115.4, 114.6, 57.6, 56.1, 46.7, 30.3. MS (EI,  $m/z$ ) = 354.2 [ $\text{M}$ ]<sup>+</sup> (calculated: 354.4). Anal. Calcd for  $\text{C}_{19}\text{H}_{18}\text{N}_2\text{O}_3\text{S}$ : C = 64.39, H = 5.12, N = 7.90; Found: C = 64.41, H = 5.15, N = 7.86.

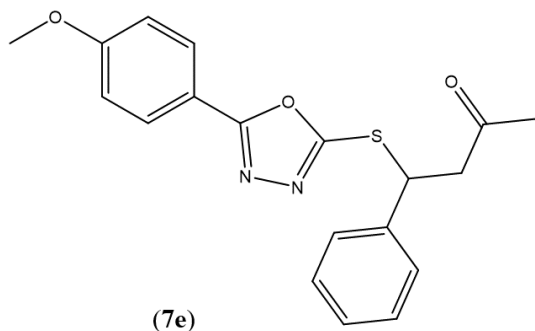

#### 4-(4-chlorophenyl)-4-[[5-(4-methoxyphenyl)-1,3,4-oxadiazol-2-yl]sulfanyl]butan-2-one:

White powder (yield: 77%); mp: 107 °C;  $^1\text{H}$ NMR (300 MHz, Chloroform-*d*)  $\delta$  7.85 (dd,  $J = 7.6, 3.8$  Hz, 2H), 7.46 (dd,  $J = 7.4, 3.7$  Hz, 2H), 7.32 (dd,  $J = 5.9, 2.7$  Hz, 2H), 6.98 (dd,  $J = 7.6, 3.7$  Hz, 2H), 6.28 – 6.15 (m, 1H), 3.88 (d,  $J = 3.2$  Hz, 3H), 3.61 (dt,  $J = 12.8, 6.2$  Hz, 1H), 3.25 (dt,  $J = 17.7, 5.2$  Hz, 1H), 2.21 (d,  $J = 3.3$  Hz, 3H).  $^{13}\text{C}$ NMR (75 MHz, DMSO-*d*<sub>6</sub>)  $\delta$  205.1, 175.4, 163.0, 159.5, 136.9, 133.4, 129.4, 129.2, 128.7, 115.4, 114.5, 57.0, 56.1, 46.5, 30.3. MS (EI,  $m/z$ ) = 388.2 [ $\text{M}$ ]<sup>+</sup> (calculated: 388.9). Anal. Calcd for  $\text{C}_{19}\text{H}_{17}\text{ClN}_2\text{O}_3\text{S}$ : C = 58.69, H = 4.41, N = 7.20; Found: C = 58.64, H = 4.45, N = 7.22.

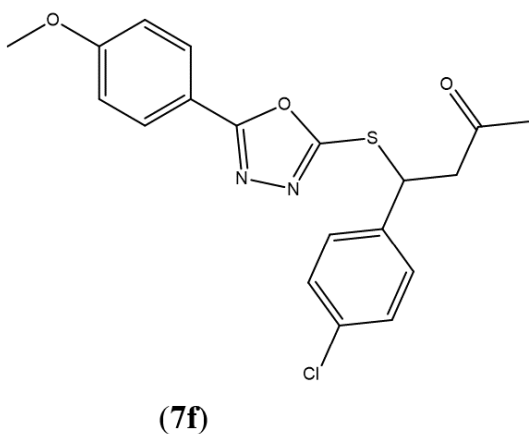



#### 4-(4-nitrophenyl)-4-[[5-phenyl-1,3,4-oxadiazol-2-yl]sulfanyl]butan-2-one:

Brownish crystal (yield: 70%); mp: 132 °C;  $^1\text{H}$ NMR (300 MHz, Chloroform-*d*)  $\delta$  8.23 (d,  $J$  = 8.4 Hz, 2H), 7.94 (d,  $J$  = 7.5 Hz, 2H), 7.70 (d,  $J$  = 8.3 Hz, 2H), 7.54 (q,  $J$  = 10.6, 7.2 Hz, 3H), 6.34 (t,  $J$  = 7.3 Hz, 1H), 3.69 (dd,  $J$  = 18.0, 8.5 Hz, 1H), 3.34 (dd,  $J$  = 18.1, 6.0 Hz, 1H), 2.26 (d,  $J$  = 3.4 Hz, 3H).  $^{13}\text{C}$ NMR (75 MHz, Chloroform-*d*)  $\delta$  207.6, 180.7, 164.4, 152.6, 148.4, 137.4, 133.9, 133.3, 131.2, 128.8, 126.8, 61.6, 51.4, 34.9. MS (EI,  $m/z$ ) = 369.2 [ $\text{M}$ ] $^+$  (calculated: 369.4). Anal. Calcd for  $\text{C}_{18}\text{H}_{15}\text{N}_3\text{O}_4\text{S}$ : C = 58.53, H = 4.09, N = 11.38; Found: C = 58.47, H = 4.21, N = 11.41.

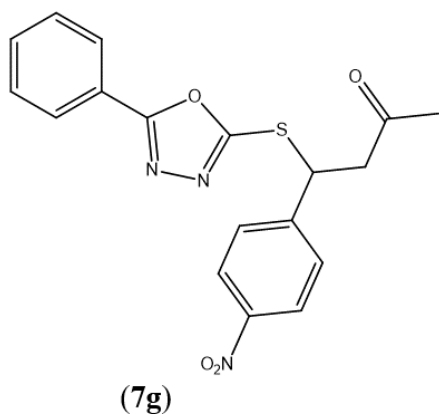

#### 4-[[5-(4-methoxyphenyl)-1,3,4-oxadiazol-2-yl]sulfanyl]-4-(4-nitrophenyl)butan-2-one:

White powder (yield: 75%); mp: 147 °C;  $^1\text{H}$ NMR (300 MHz, Chloroform-*d*)  $\delta$  8.17 – 8.09 (m, 2H), 7.82 – 7.73 (m, 2H), 7.59 (d,  $J$  = 8.8 Hz, 2H), 6.96 – 6.88 (m, 2H), 6.21 (dd,  $J$  = 8.5, 6.0 Hz, 1H), 3.79 (s, 3H), 3.59 (dd,  $J$  = 18.0, 8.5 Hz, 1H), 3.23 (dd,  $J$  = 18.1, 6.0 Hz, 1H), 2.15 (s, 3H).  $^{13}\text{C}$ NMR (75 MHz, DMSO-*d*<sub>6</sub>)  $\delta$  204.9, 175.7, 163.1, 159.6, 147.7, 145.1, 128.9, 128.8, 124.3, 115.4, 114.5, 57.2, 56.1, 46.5, 30.2. MS (EI,  $m/z$ ) = 399.2 [ $\text{M}$ ] $^+$  (calculated: 399.4). Anal. Calcd for  $\text{C}_{19}\text{H}_{17}\text{N}_3\text{O}_5\text{S}$ : C = 57.13, H = 4.29, N = 10.52; Found: C = 57.20, H = 4.22, N = 10.45.

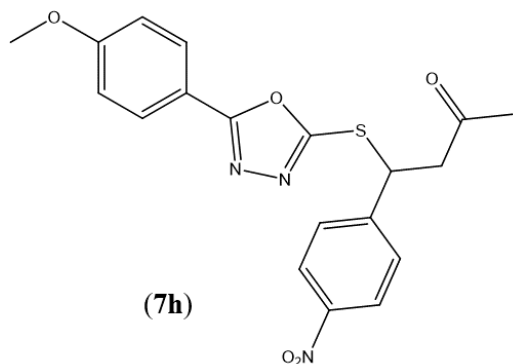

**1-[[5-(4-methoxyphenyl)-1,3,4-oxadiazol-2-yl]sulfanyl]-4-methyl-1-phenylpentan-3-one:**

White powder (yield: 65%); mp: 131 °C; <sup>1</sup>HNMR (300 MHz, Chloroform-*d*) δ 7.92 – 7.81 (m, 2H), 7.54 – 7.45 (m, 2H), 7.36 (q, *J* = 7.3, 6.9 Hz, 3H), 6.99 (d, *J* = 8.6 Hz, 2H), 6.26 (dd, *J* = 9.2, 5.4 Hz, 1H), 3.88 (s, 3H), 3.72 (dd, *J* = 17.8, 9.3 Hz, 1H), 3.24 (dd, *J* = 17.7, 5.4 Hz, 1H), 2.66 (hept, *J* = 7.0 Hz, 1H), 1.11 (t, *J* = 7.1 Hz, 6H). <sup>13</sup>CNMR (75 MHz, Chloroform-*d*) δ 209.6, 175.6, 162.7, 159.3, 137.1, 128.8, 128.5, 128.2, 127.4, 114.9, 114.5, 77.4, 77.0, 76.6, 57.6, 55.5, 43.9, 41.0, 18.1, 17.9. MS (EI, *m/z*) = 382.3 [M]<sup>+</sup> (calculated: 382.5). Anal. Calcd for C<sub>21</sub>H<sub>22</sub>N<sub>2</sub>O<sub>3</sub>S: C = 65.95, H = 5.80, N = 7.32; Found: C = 66.05, H = 5.77, N = 7.36.

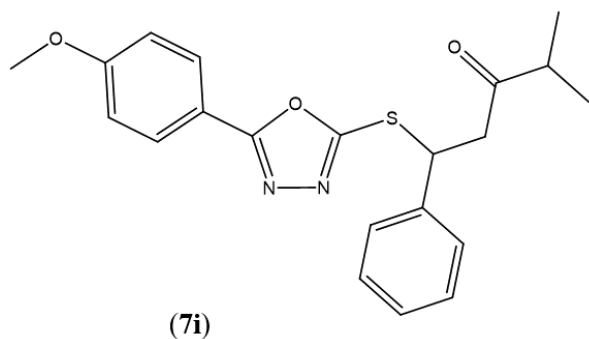

**1-[[5-(4-methoxyphenyl)-1,3,4-oxadiazol-2-yl]sulfanyl]-4-methyl-1-(2-nitrophenyl)pentan-3-one:**

Light-brown powder (yield: 94%); mp: 126 °C; <sup>1</sup>HNMR (300 MHz, Chloroform-*d*) δ 8.08 – 7.98 (m, 1H), 7.85 (d, *J* = 8.5 Hz, 2H), 7.66 – 7.54 (m, 1H), 7.48 (t, *J* = 7.7 Hz, 2H), 7.08 – 6.96 (m, 2H), 6.68 (dd, *J* = 10.9, 3.0 Hz, 1H), 3.89 (s, 2H), 3.81 (dd, *J* = 18.0, 10.9 Hz, 1H), 3.28 (dd, *J* = 18.0, 3.1 Hz, 1H), 2.73 (hept, *J* = 6.8 Hz, 1H), 1.17 (t, *J* = 6.7 Hz, 6H). <sup>13</sup>CNMR (75 MHz, Chloroform-*d*) δ 213.6, 180.8, 167.6, 164.0, 153.1, 138.5, 138.5, 133.8, 133.0, 132.9, 129.6, 119.4, 60.3, 58.7, 48.5, 45.4, 23.1, 22.7. MS (EI, *m/z*) = 427.3 [M]<sup>+</sup> (calculated: 427.5). Anal. Calcd for C<sub>21</sub>H<sub>21</sub>N<sub>3</sub>O<sub>5</sub>S: C = 59.00, H = 4.95, N = 9.83; Found: C = 58.96, H = 4.93, N = 9.89.

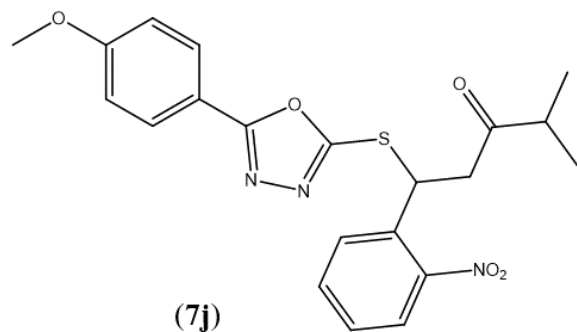

**1-[[5-(4-methoxyphenyl)-1,3,4-oxadiazol-2-yl]sulfanyl]-4-methyl-1-(3-nitrophenyl)pentan-3-one:**

Yellowish crystal (yield: 79%); mp: 146 °C; <sup>1</sup>H NMR (300 MHz, Chloroform-*d*) δ 8.41 – 8.29 (m, 1H), 8.22 – 8.10 (m, 1H), 7.93 – 7.78 (m, 3H), 7.56 (t, *J* = 8.0 Hz, 1H), 6.97 (dd, *J* = 8.6, 3.3 Hz, 2H), 6.33 (dd, *J* = 8.7, 5.9 Hz, 1H), 3.86 (d, *J* = 4.1 Hz, 3H), 3.78 – 3.64 (m, 1H), 3.34 (dd, *J* = 18.2, 5.9 Hz, 1H), 2.68 (hept, *J* = 6.9 Hz, 1H), 1.11 (dd, *J* = 9.6, 6.8 Hz, 6H). <sup>13</sup>C NMR (75 MHz, Chloroform-*d*) δ 213.9, 180.4, 167.7, 164.4, 153.1, 143.8, 138.9, 134.7, 133.1, 128.3, 126.9, 119.4, 119.2, 61.5, 60.3, 48.3, 45.7, 22.8, 22.6. MS (EI, *m/z*) = 427.2 [*M*]<sup>+</sup> (calculated: 427.5). Anal. Calcd for C<sub>21</sub>H<sub>21</sub>N<sub>3</sub>O<sub>5</sub>S: C = 59.00, H = 4.95, N = 9.83; Found: C = 58.98, H = 4.93, N = 9.90.

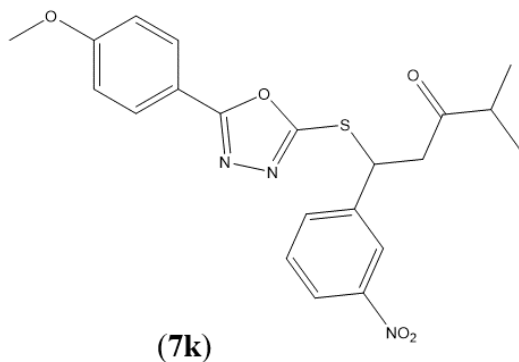

**4-[[5-(4-methoxyphenyl)-1,3,4-oxadiazol-2-yl]sulfanyl]-4-(p-tolyl)butan-2-one:**

White powder (yield: 73%); mp: 97 °C; <sup>1</sup>H NMR (300 MHz, Chloroform-*d*) δ 7.87 (d, *J* = 8.9 Hz, 2H), 7.42 (d, *J* = 7.7 Hz, 2H), 7.18 (d, *J* = 7.8 Hz, 2H), 6.99 (d, *J* = 8.9 Hz, 2H), 6.23 (dd, *J* = 8.9, 5.7 Hz, 1H), 3.88 (s, 3H), 3.64 (dd, *J* = 17.6, 8.9 Hz, 1H), 3.26 (dd, *J* = 17.4, 5.7 Hz, 1H), 2.34 (s, 3H), 2.22 (s, 3H). <sup>13</sup>C NMR (75 MHz, Chloroform-*d*) δ 203.83, 175.54, 162.77, 159.39, 138.57, 133.96, 129.51, 128.34, 127.39, 114.89, 114.55, 57.43, 55.56, 46.90, 30.22, 21.19. MS (EI, *m/z*) = 369.2 [*M*]<sup>+</sup> (calculated: 368.5). Anal. Calcd for C<sub>20</sub>H<sub>20</sub>N<sub>2</sub>O<sub>3</sub>S: C = 65.20, H = 5.47, N = 7.60; Found: C = 65.17, H = 5.48, N = 7.63.

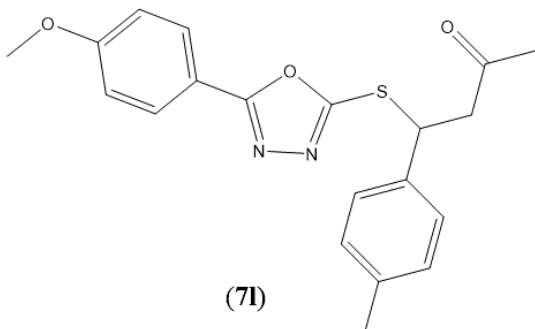

3. Spectral data of compounds 7a-l ( $^1\text{H}$ NMR,  $^{13}\text{C}$  NMR, and mass spectrometry):

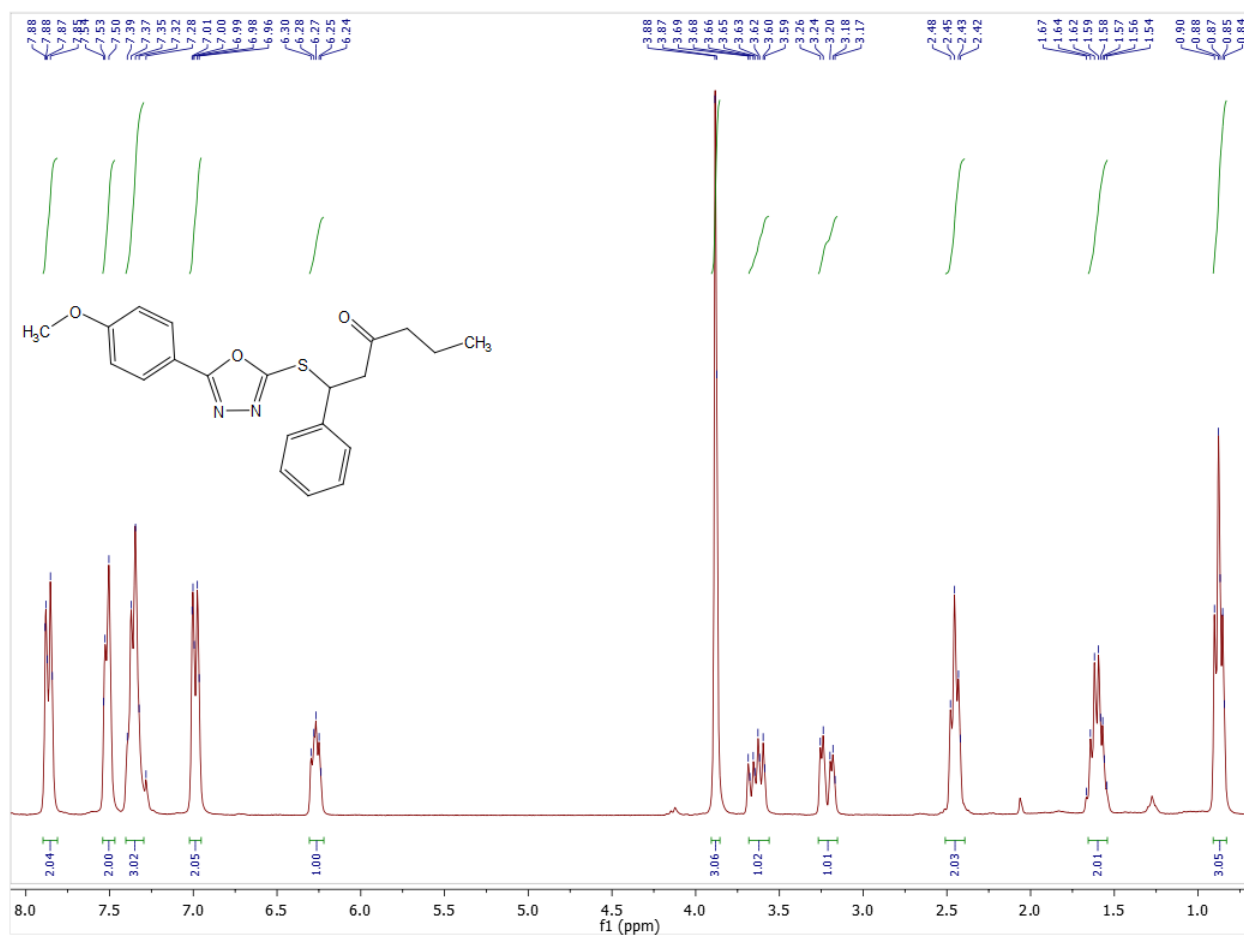

$^1\text{H}$  NMR of **7a** in  $\text{CDCl}_3$

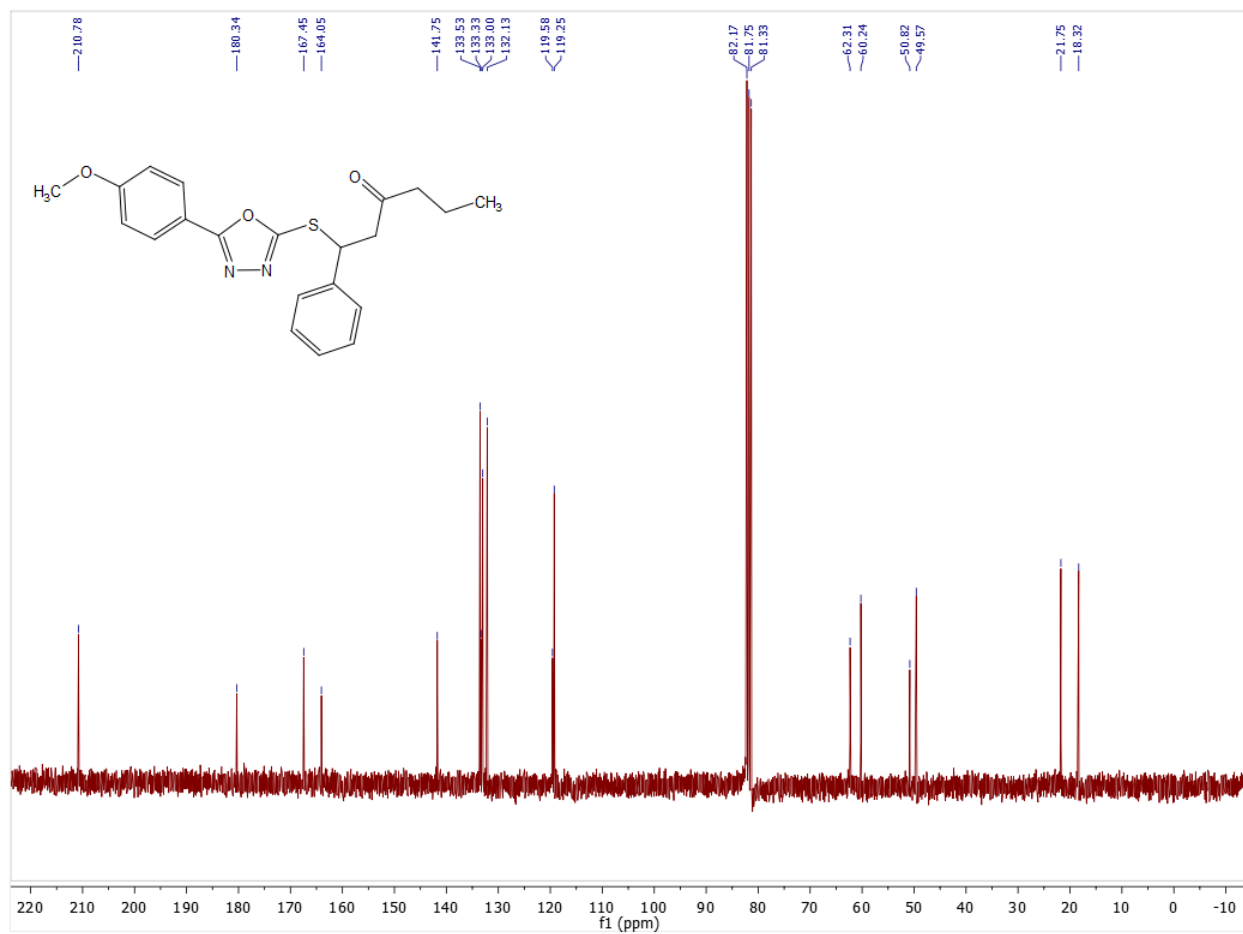

$^{13}\text{C}$  NMR of **7a** in  $\text{CDCl}_3$

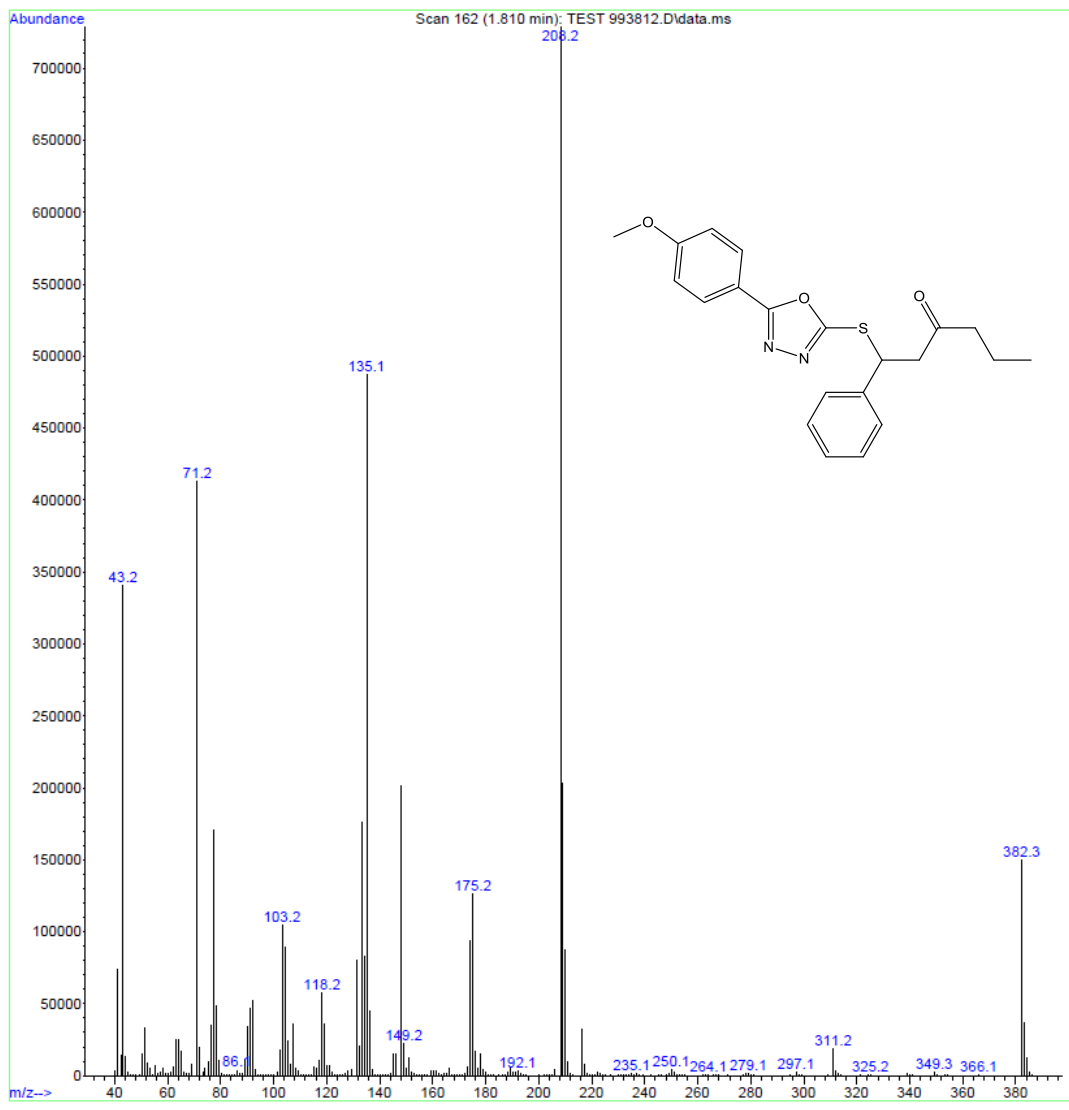

Mass spectrum of **7a**

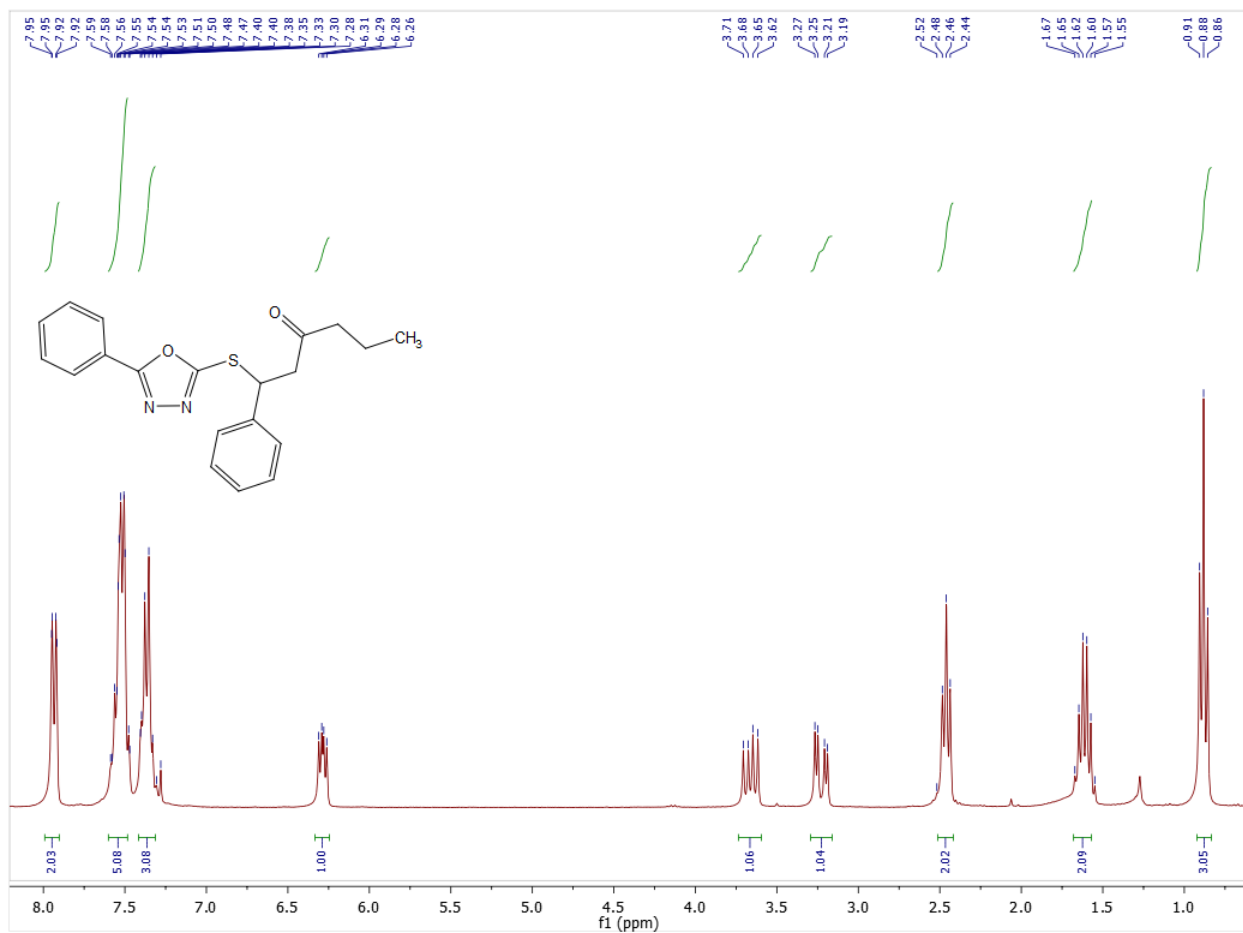

<sup>1</sup>H NMR of **7b** in CDCl<sub>3</sub>

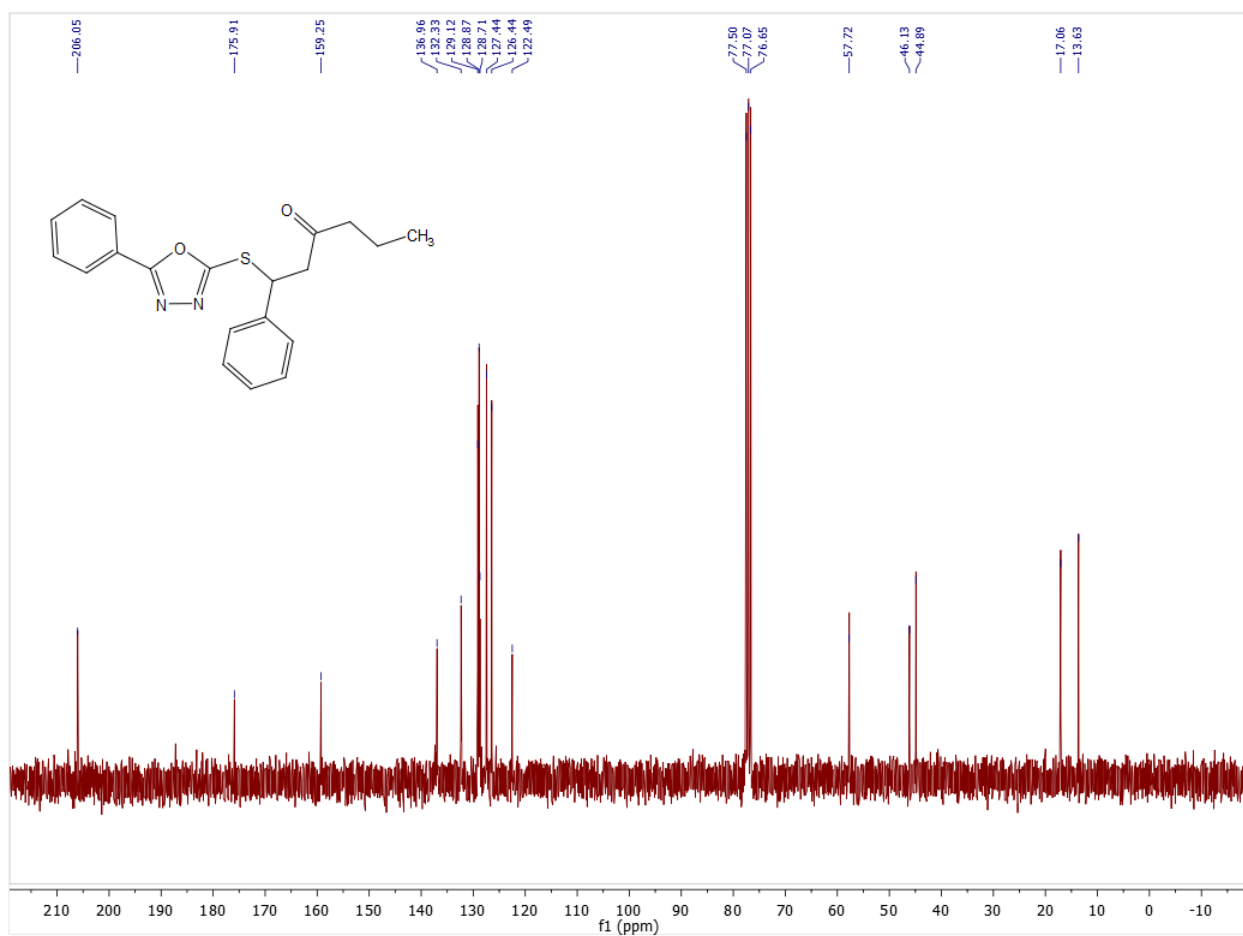

$^{13}\text{C}$  NMR of **7b** in  $\text{CDCl}_3$



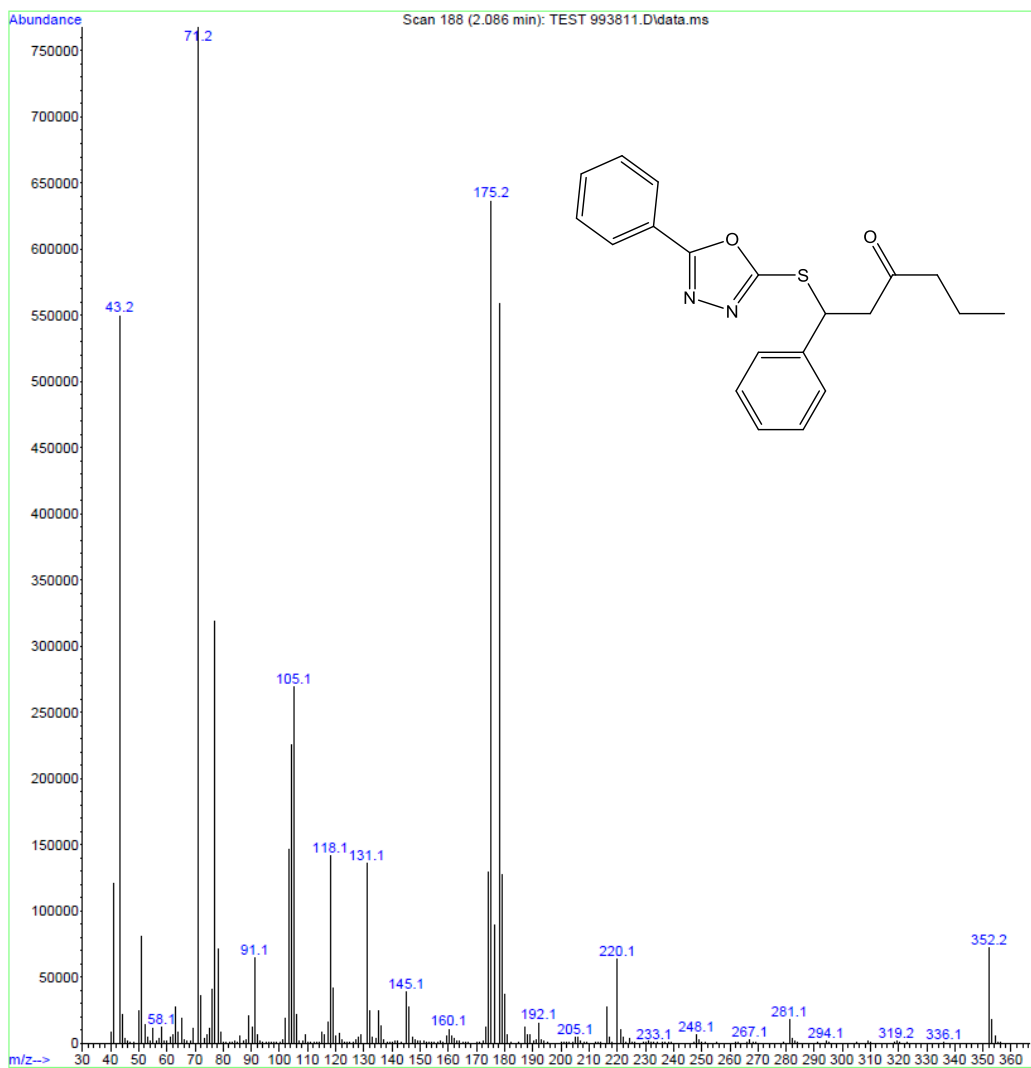

Mass spectrum of **7b**

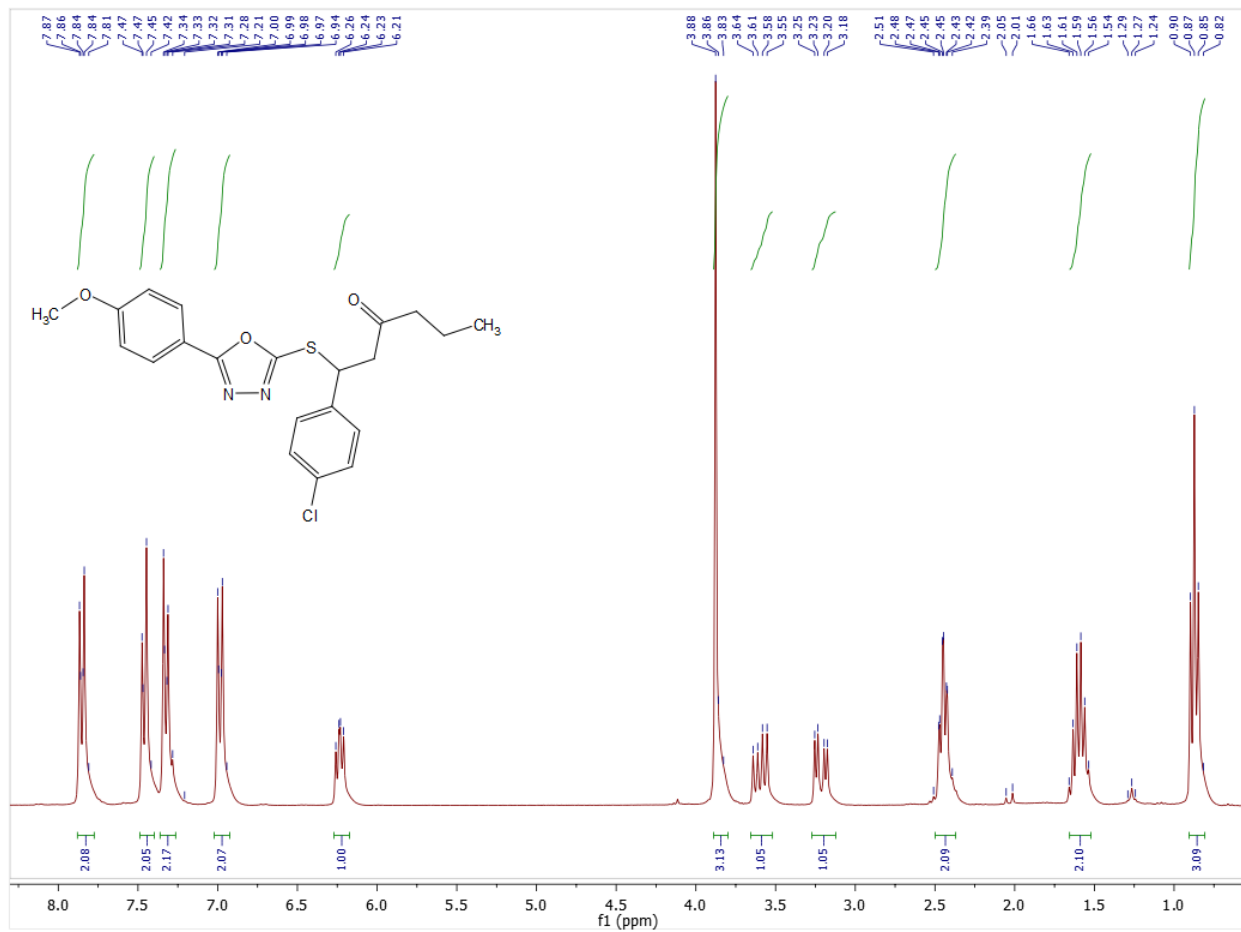

$^1\text{H}$  NMR of **7c** in  $\text{CDCl}_3$

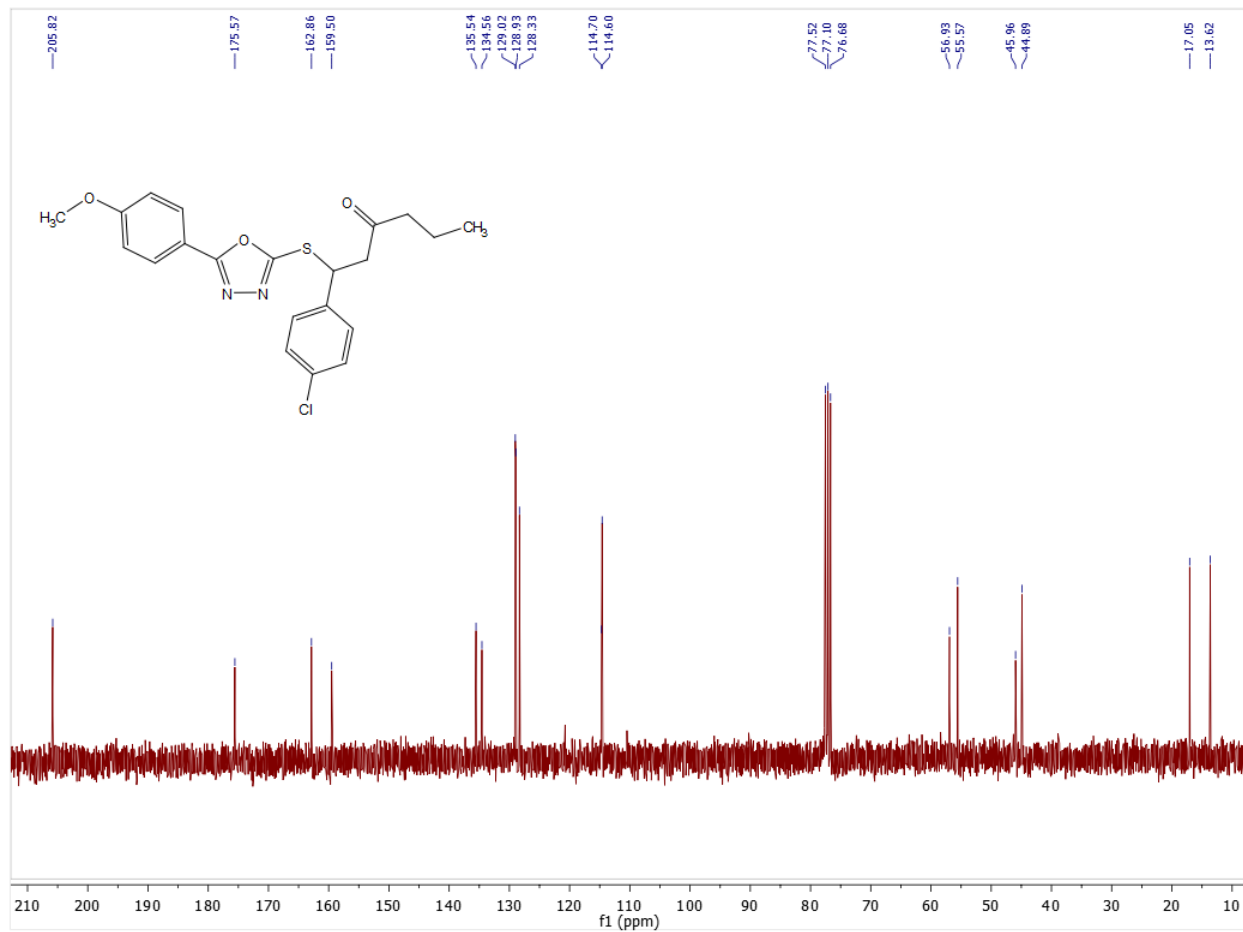

$^{13}\text{C}$  NMR of **7c** in  $\text{CDCl}_3$

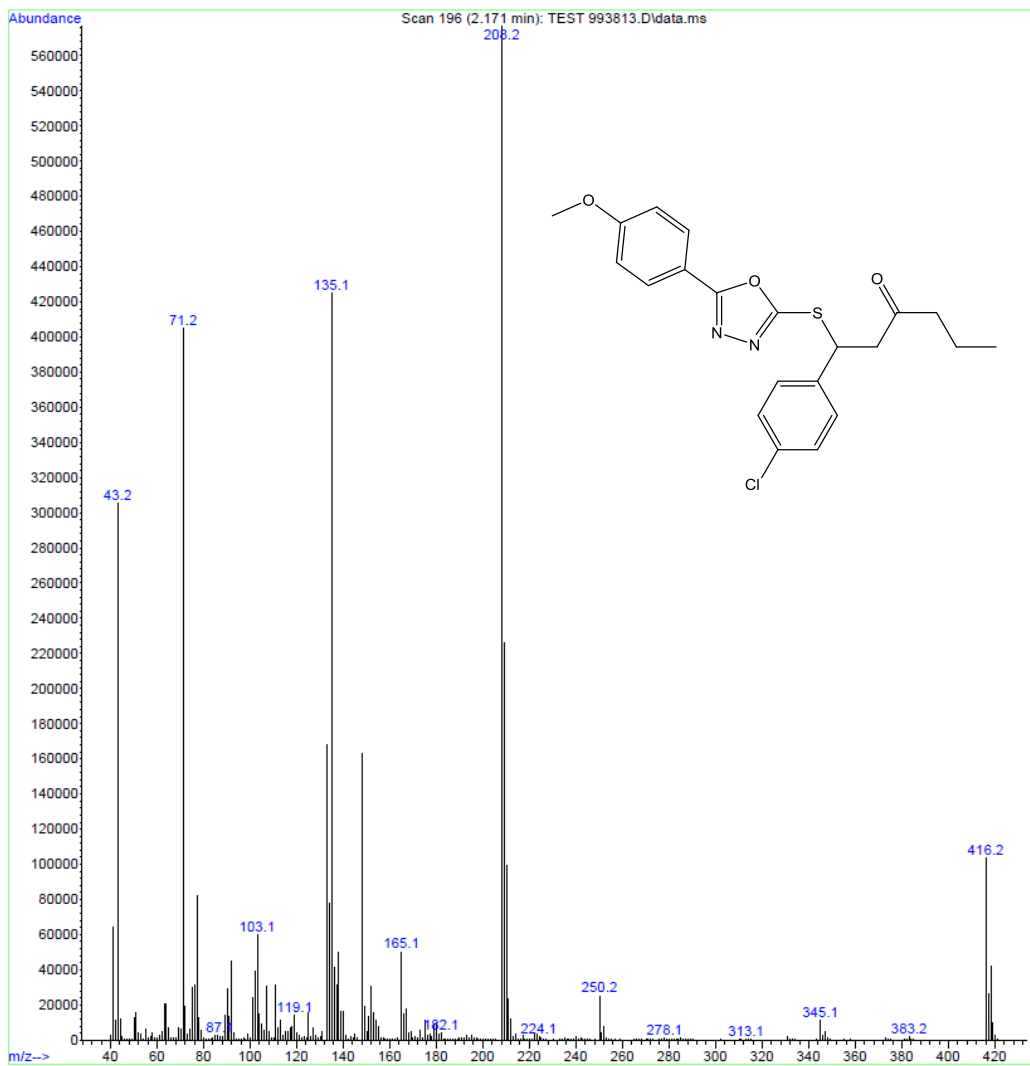

Mass spectrum of **7c**

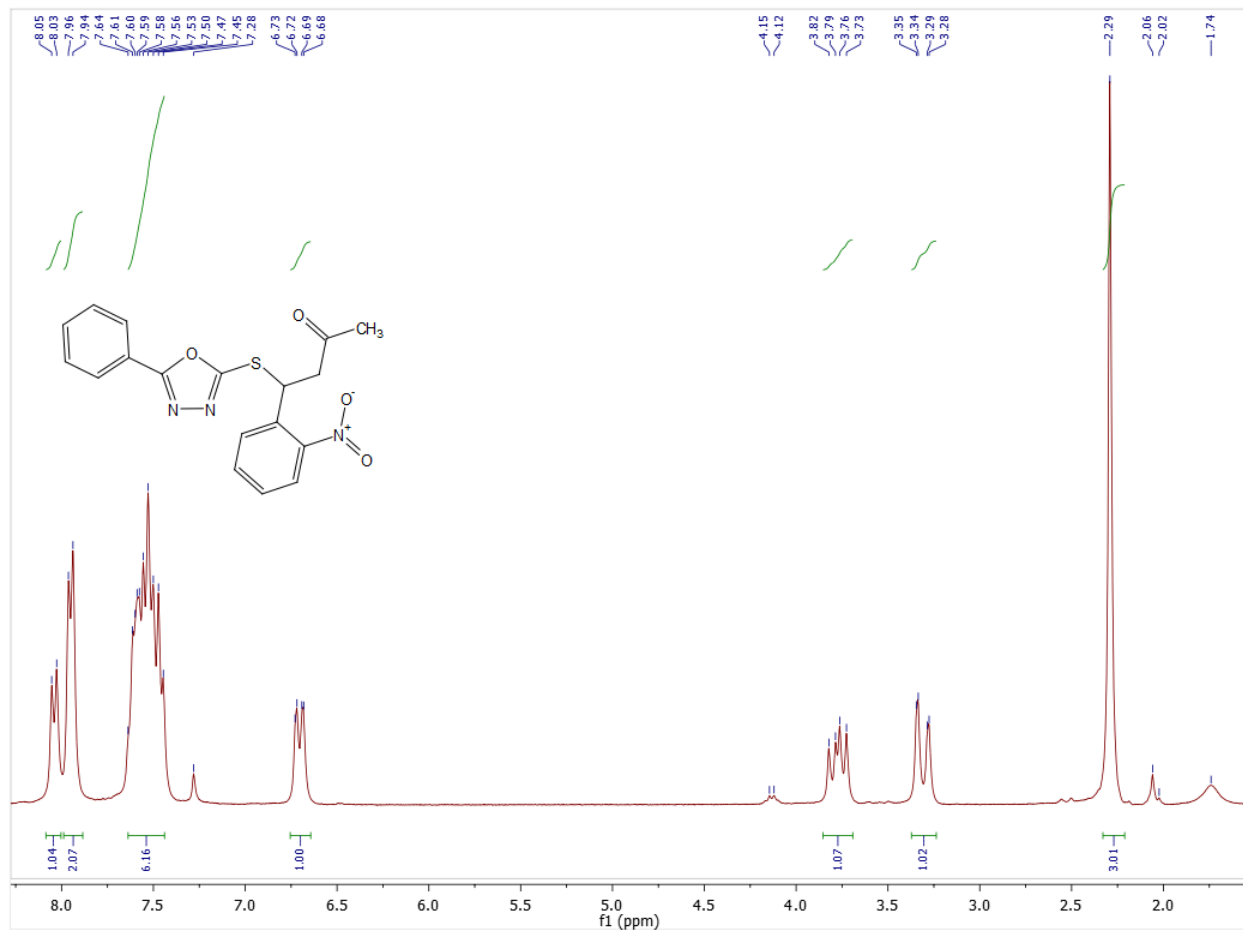

$^1\text{H}$  NMR of **7d** in  $\text{CDCl}_3$

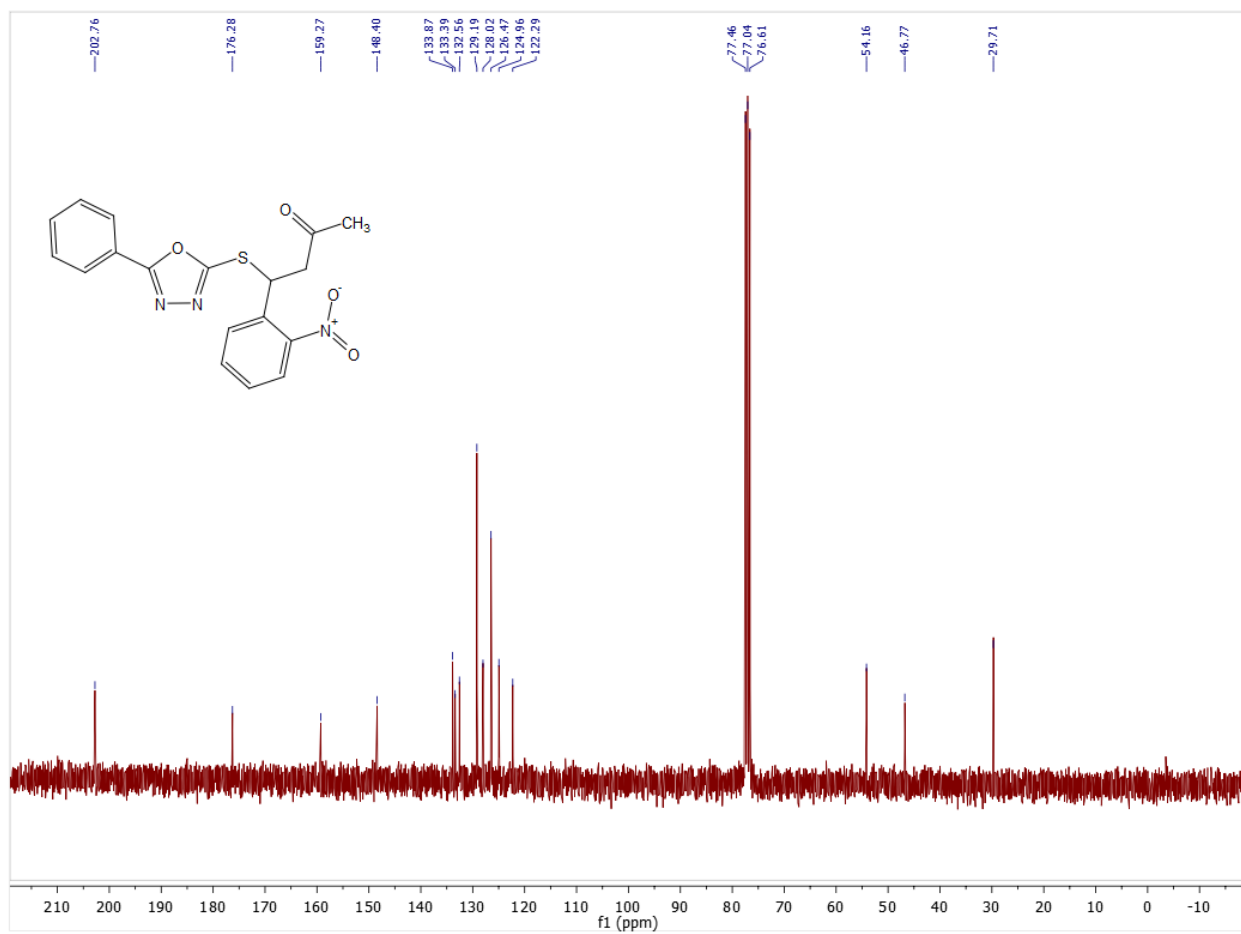

$^{13}\text{C}$  NMR of **7d** in  $\text{CDCl}_3$

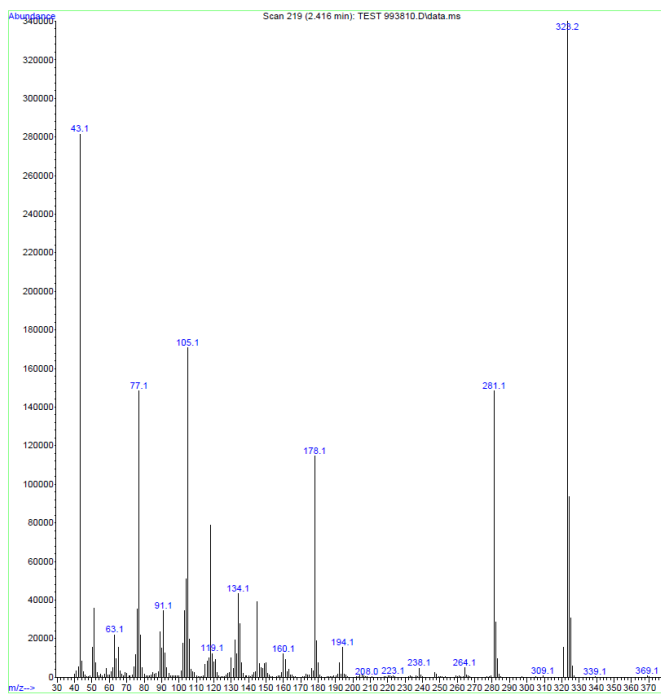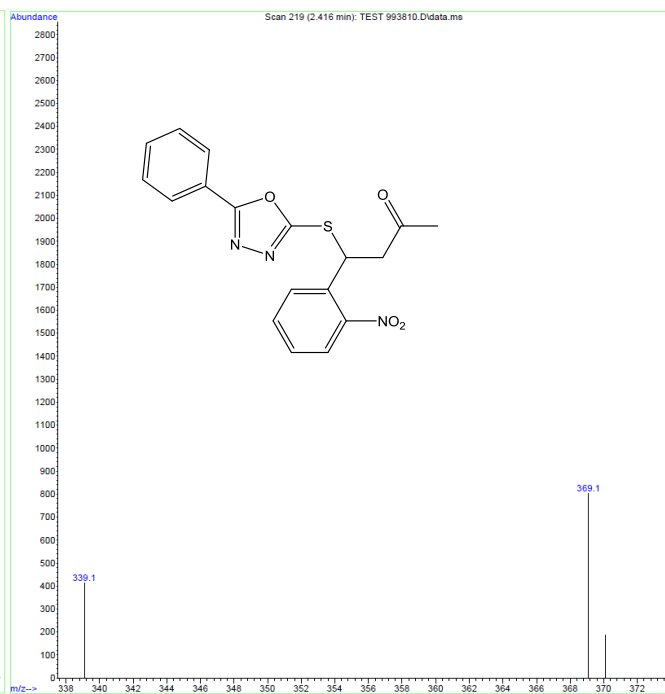

Mass spectrum of **7d**

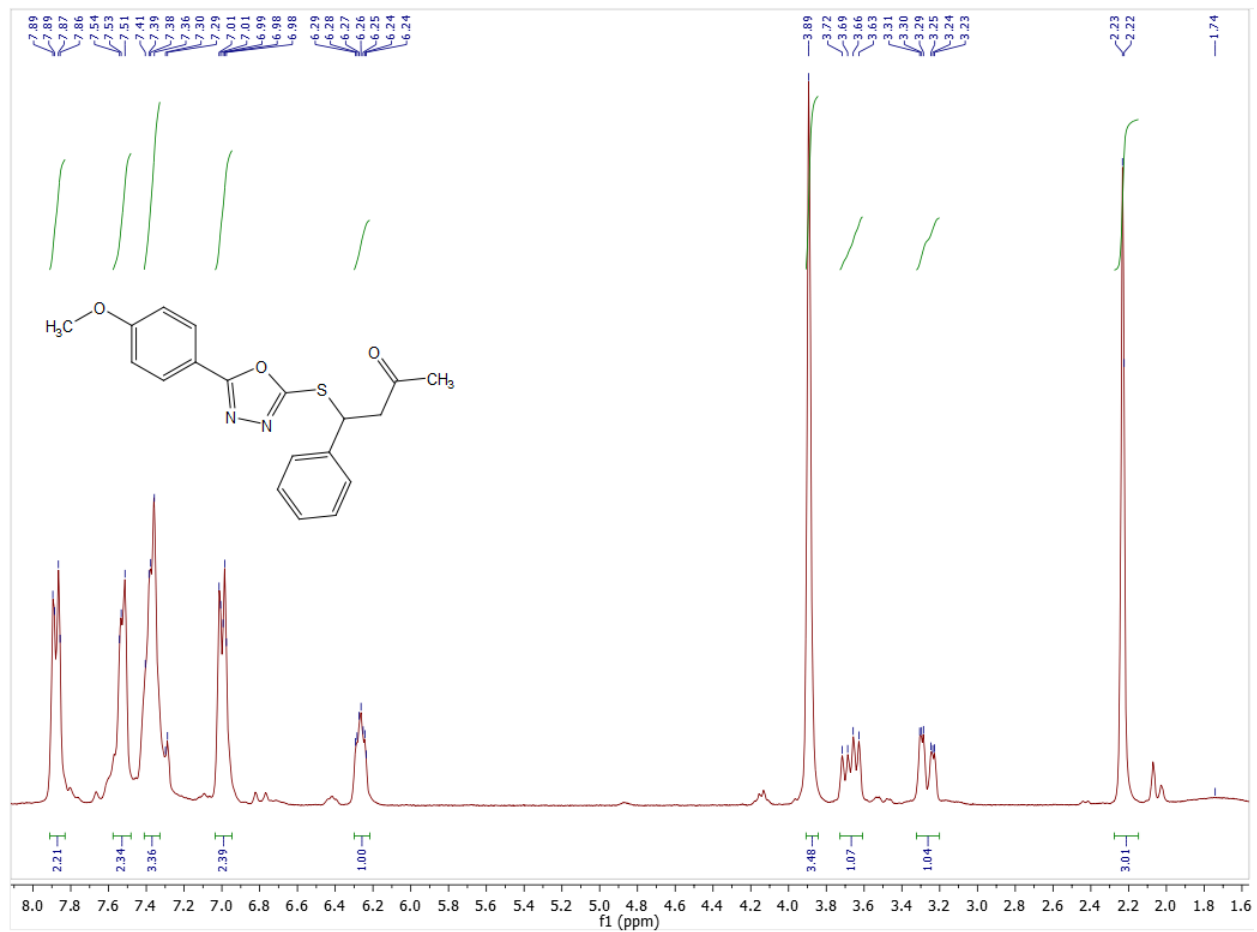

<sup>1</sup>H NMR of **7e** in CDCl<sub>3</sub>



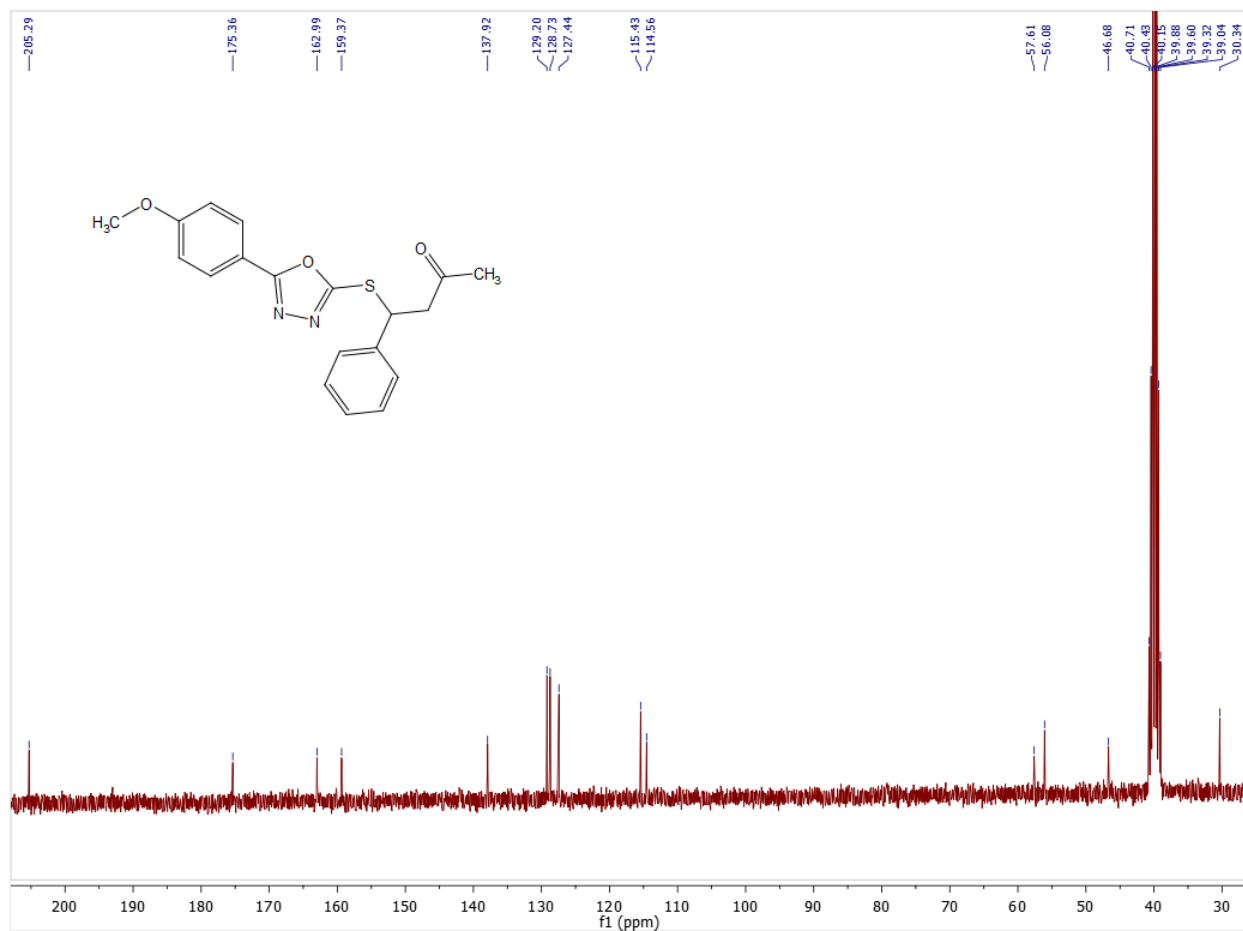

$^{13}\text{C}$  NMR of **7e** in DMSO

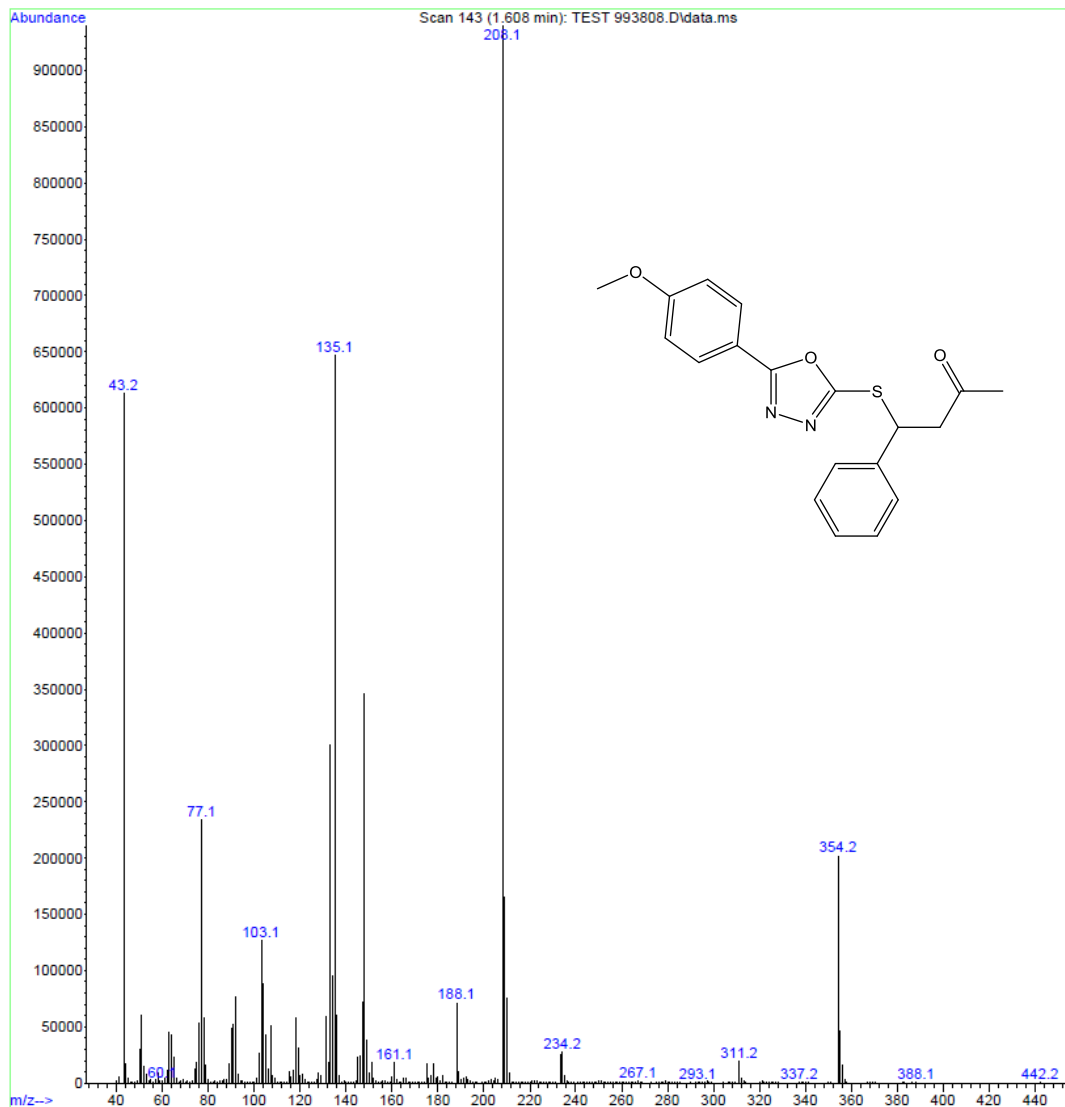

Mass spectrum of **7e**

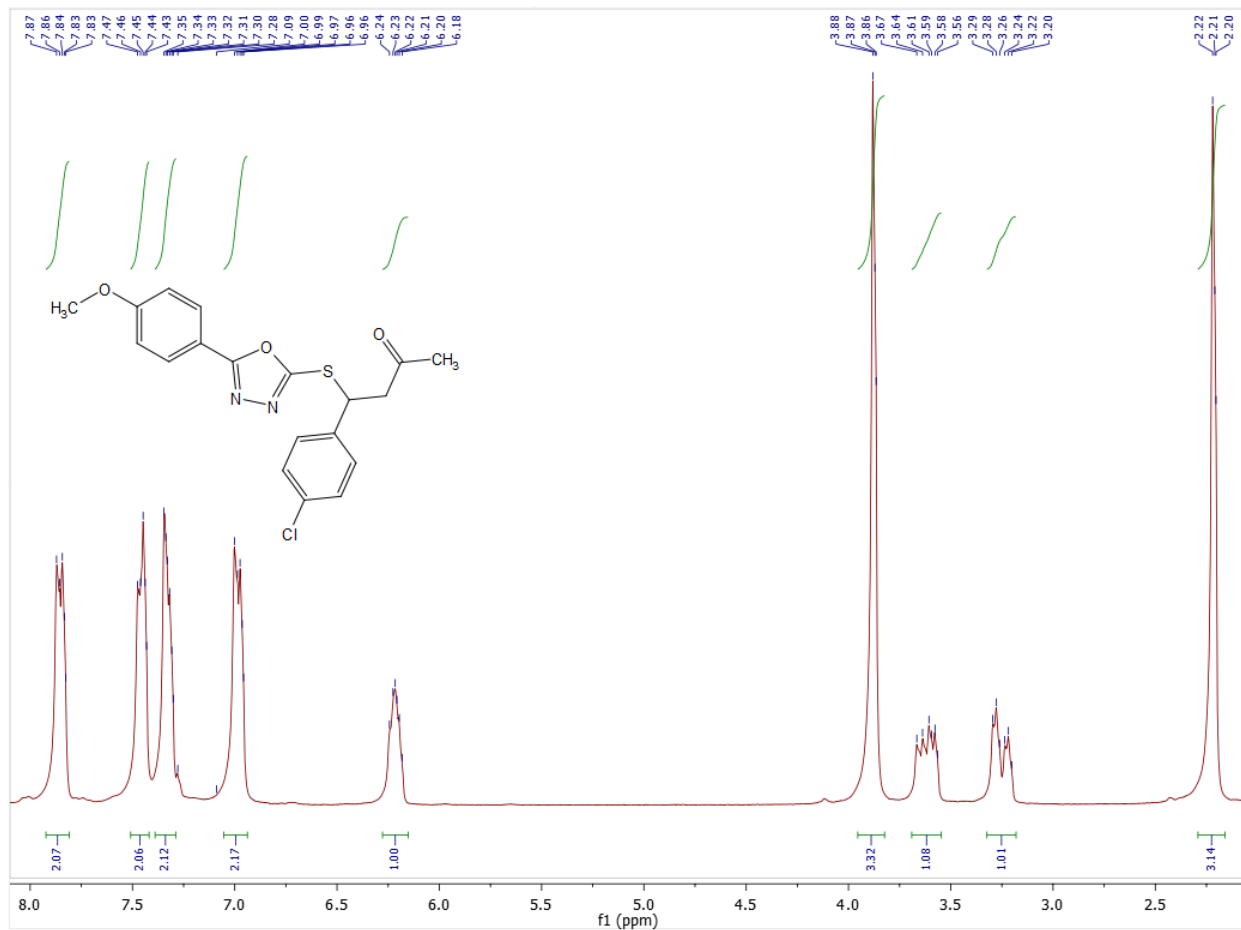

$^1\text{H}$  NMR of **7f** in  $\text{CDCl}_3$

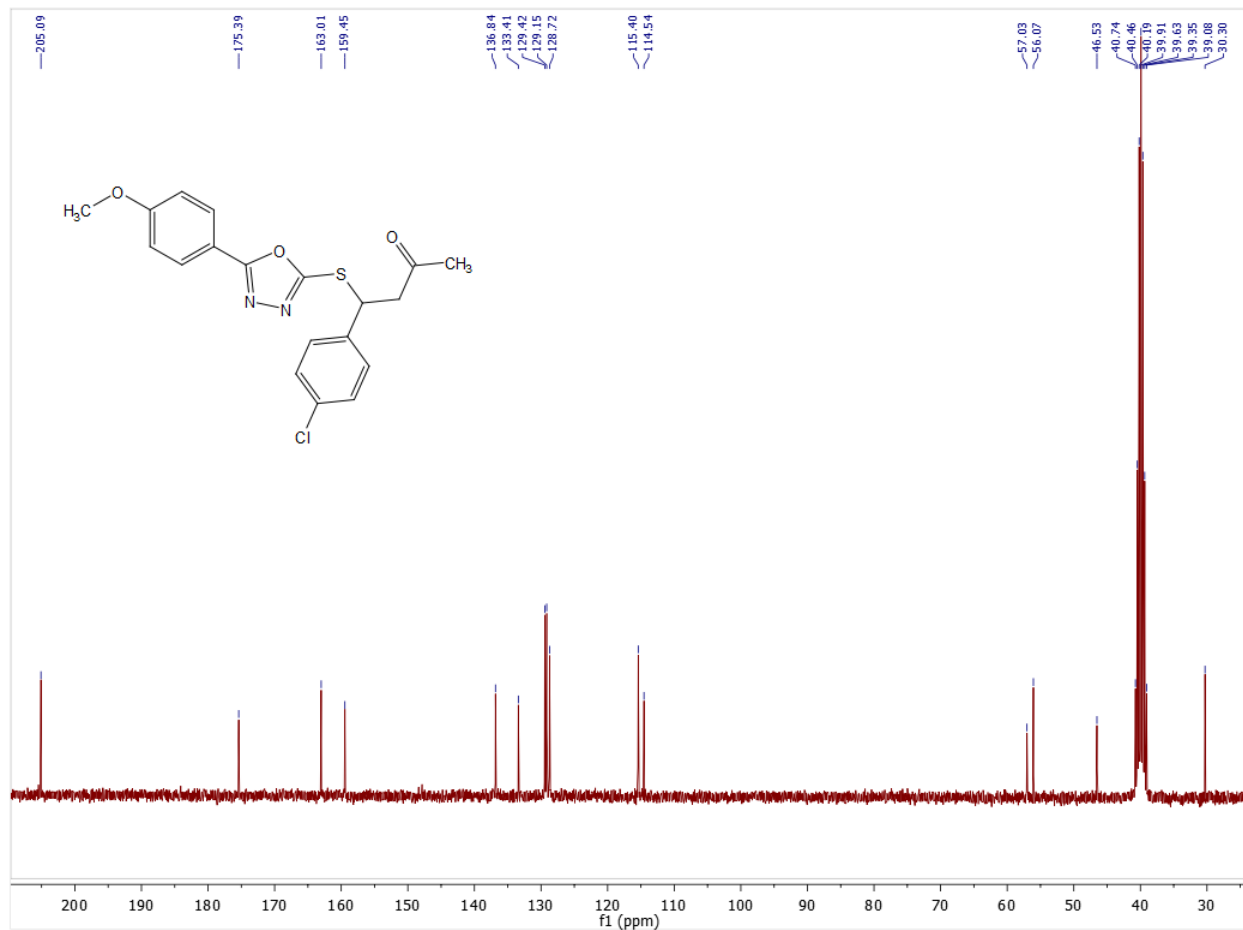

<sup>13</sup>C NMR of **7f** in DMSO

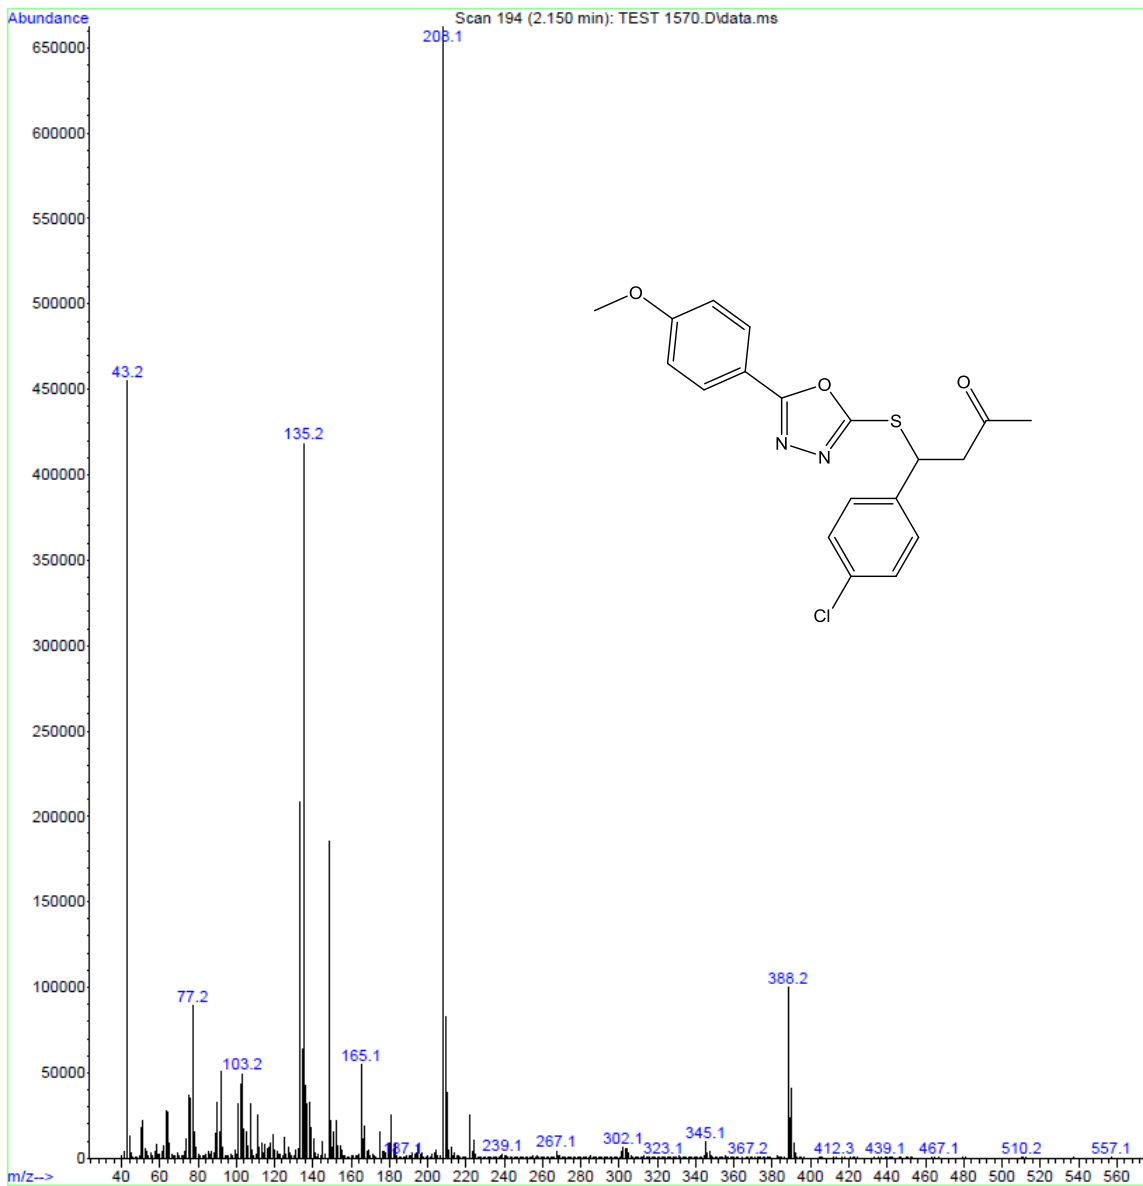

Mass spectrum of **7f**

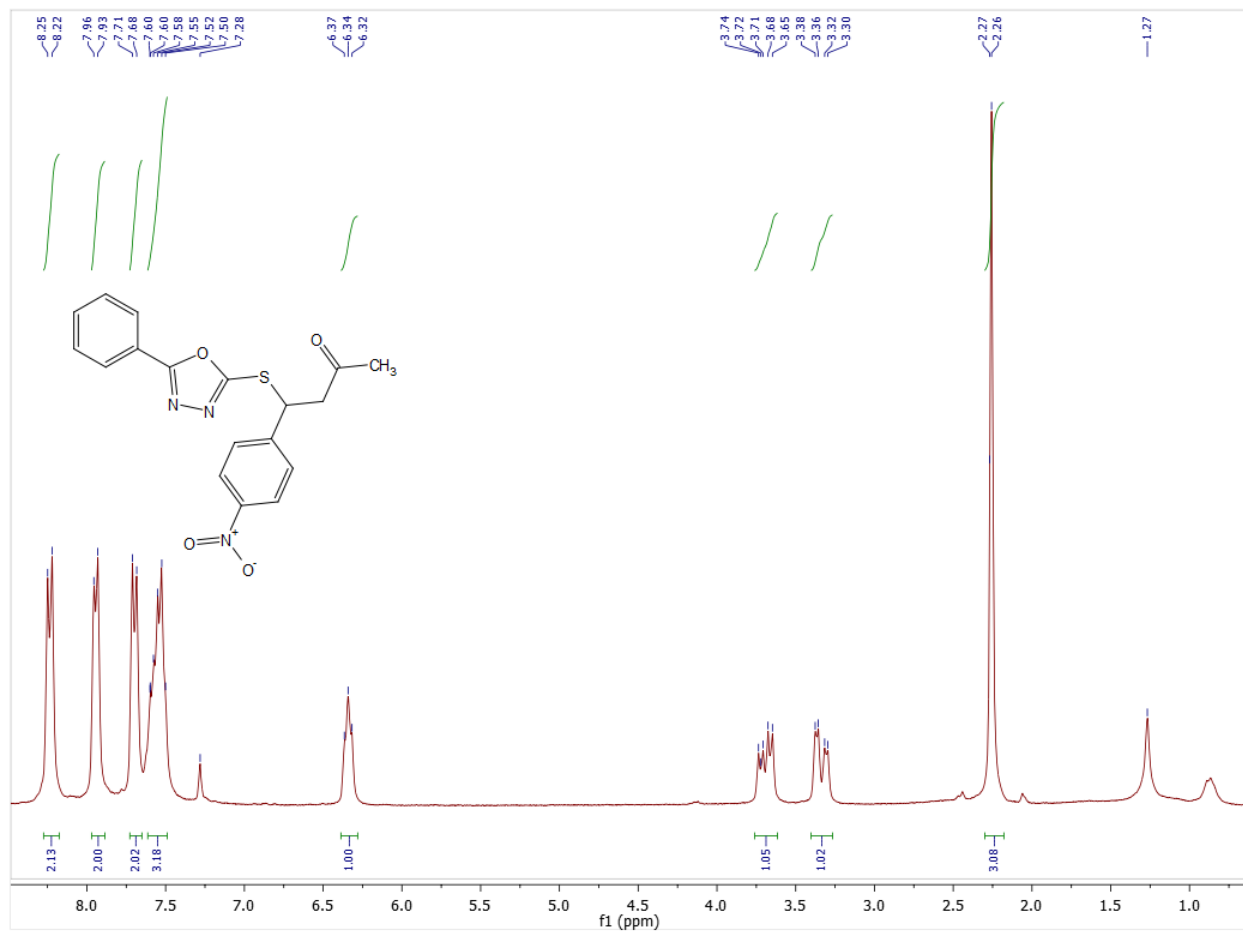

<sup>1</sup>H NMR of 7g in CDCl<sub>3</sub>

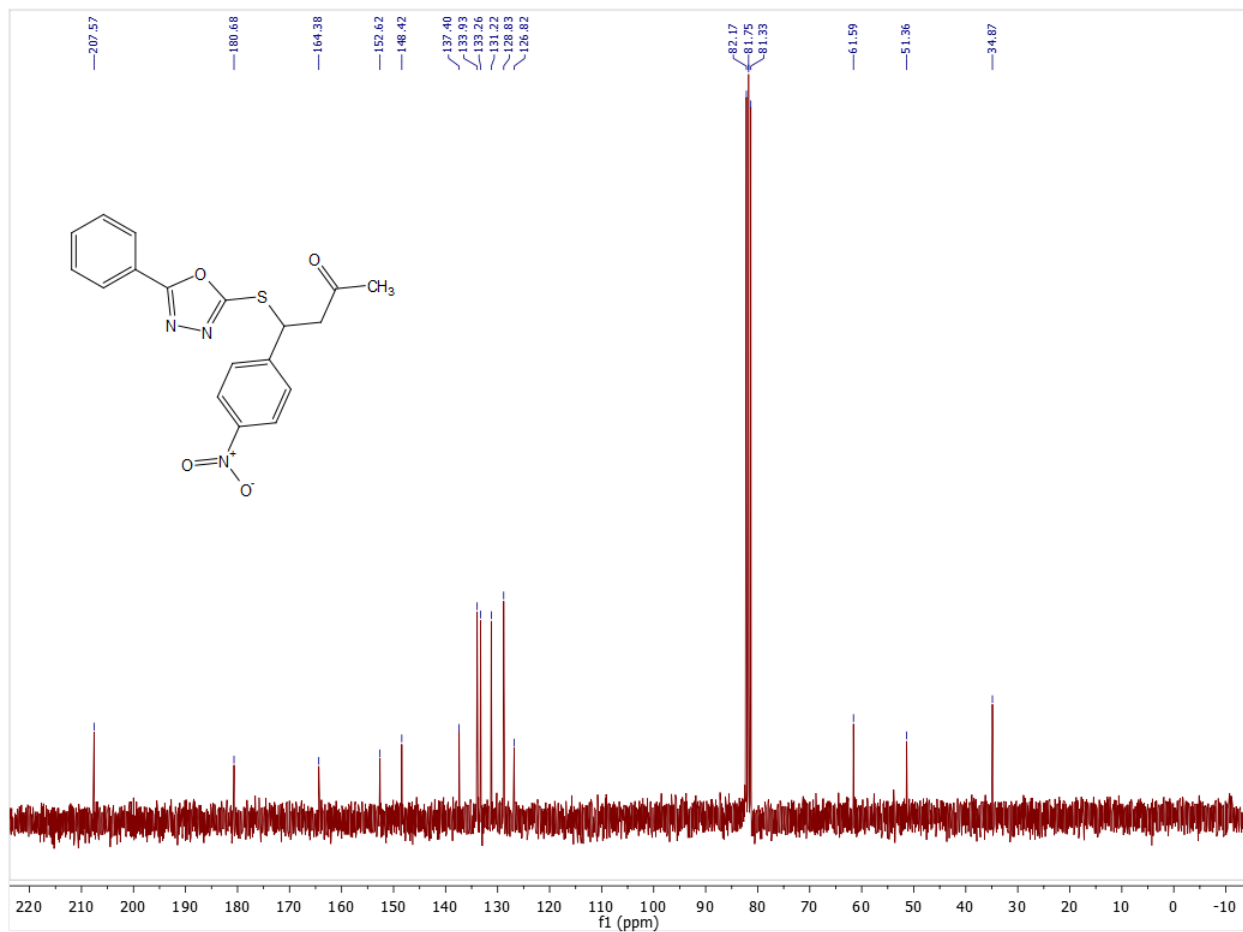

<sup>13</sup>C NMR of **7g** in CDCl<sub>3</sub>

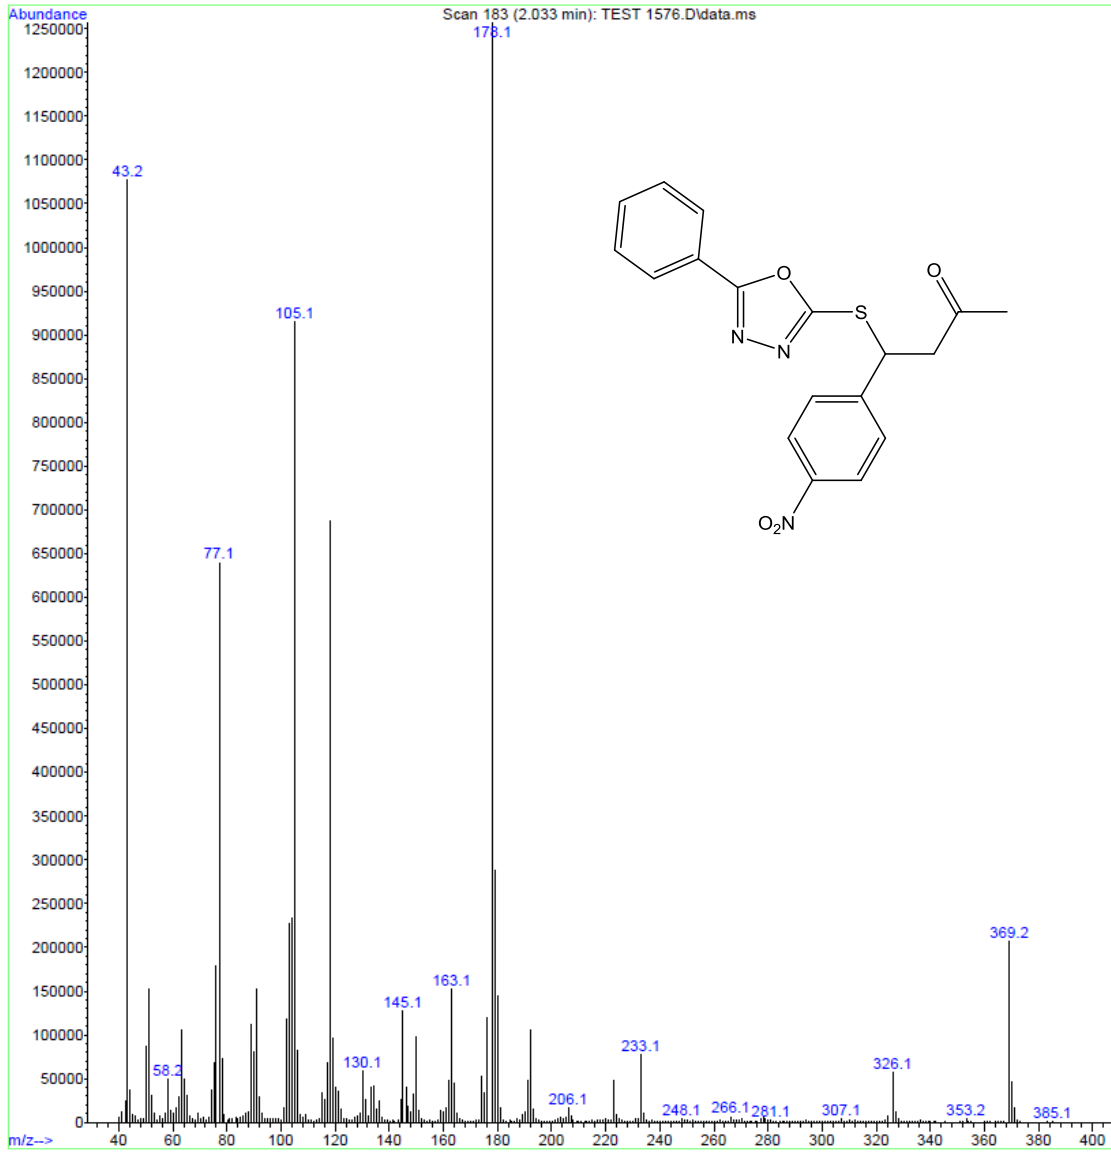

Mass spectrum of **7g**



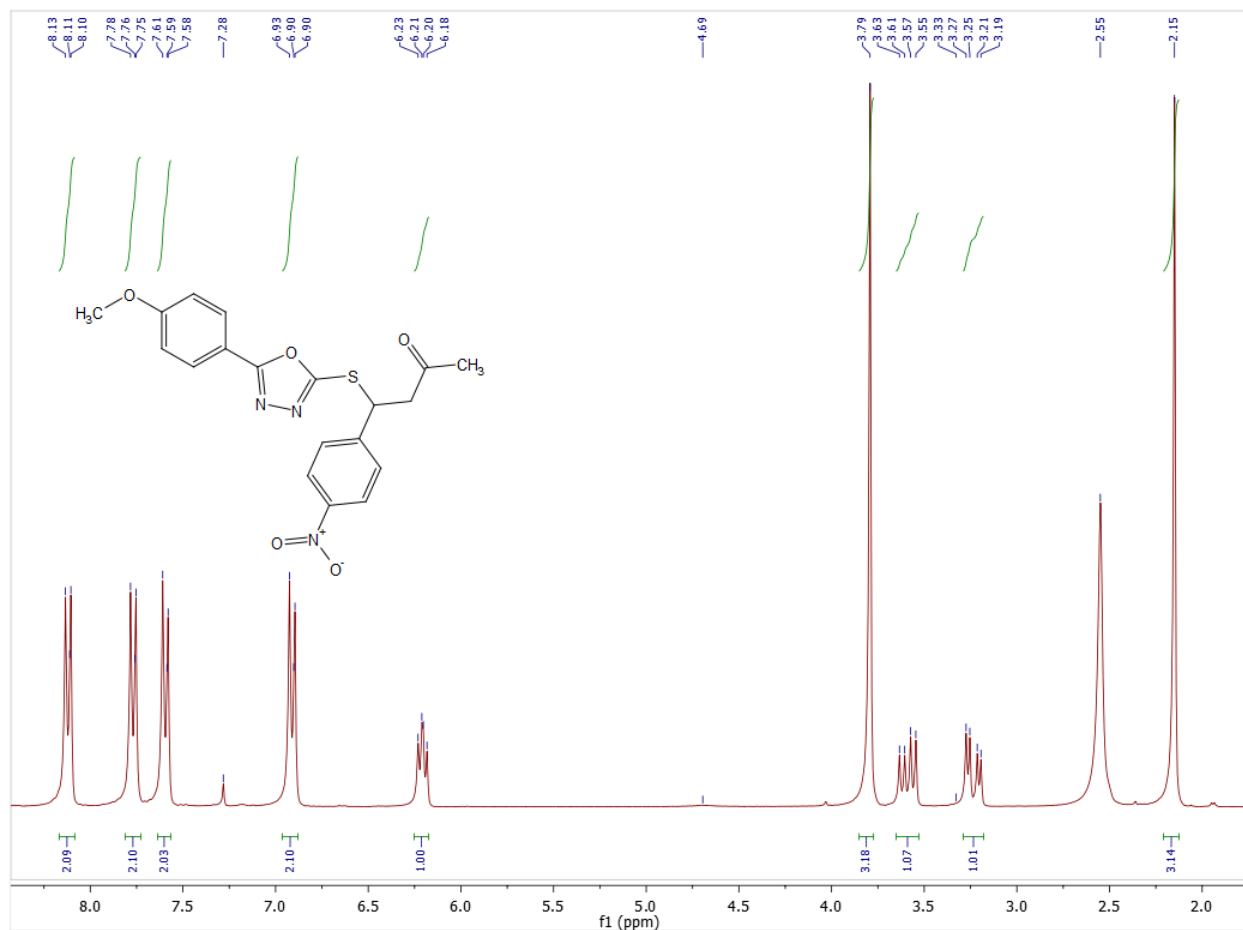

<sup>1</sup>H NMR of **7h** in CDCl<sub>3</sub>

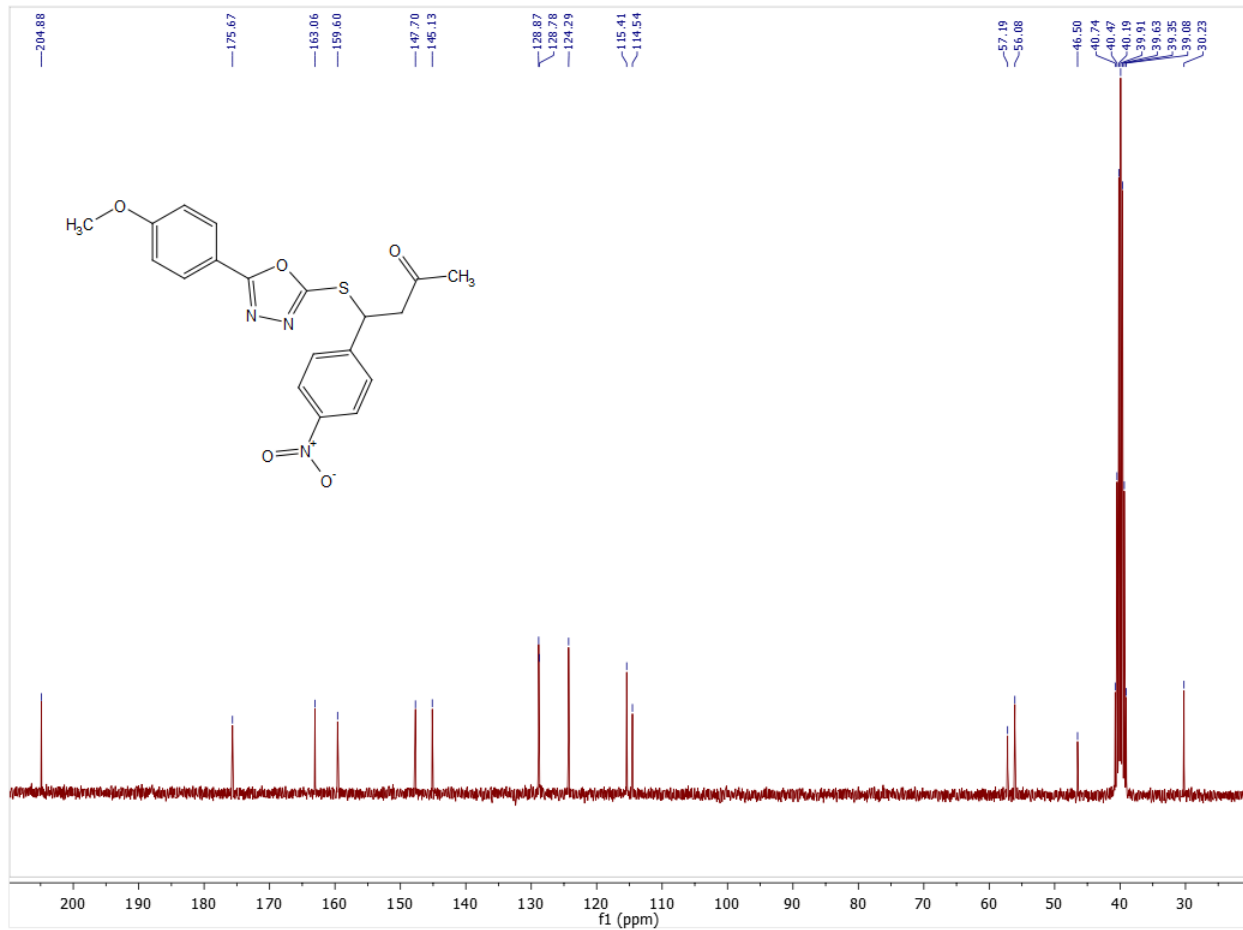

$^{13}\text{C}$  NMR of **7h** in DMSO

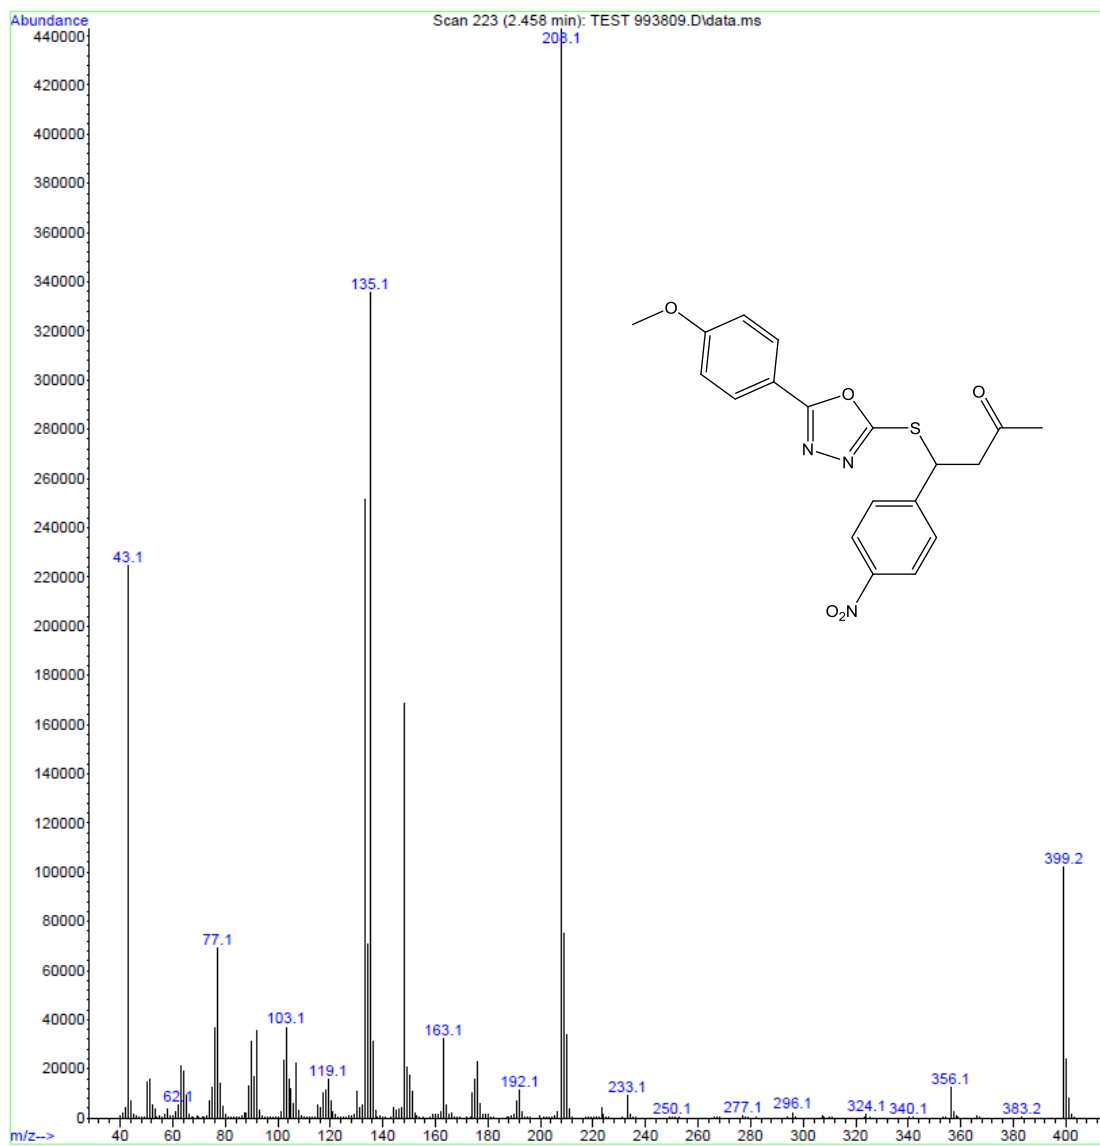

Mass spectrum of **7h**

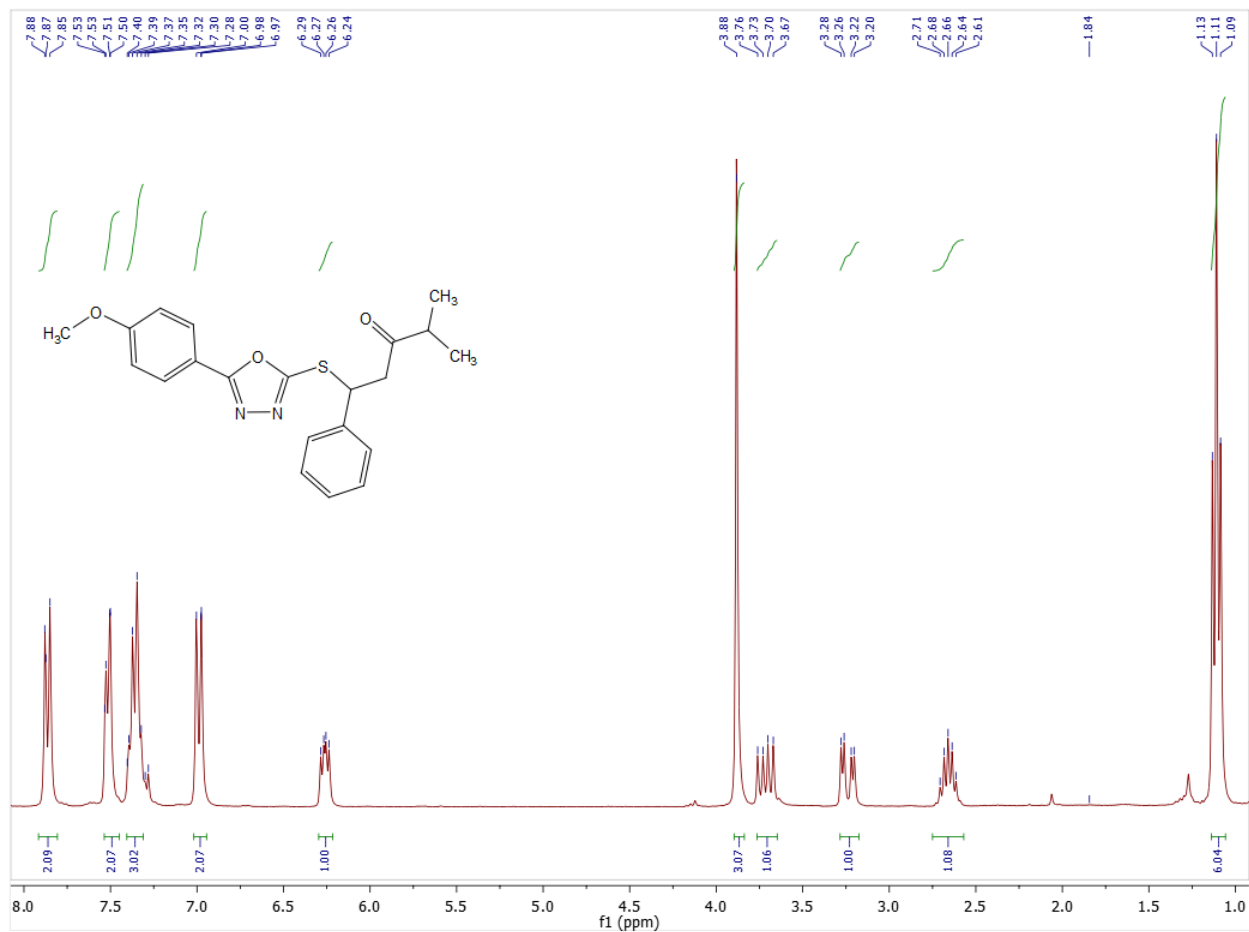

$^1\text{H}$  NMR of **7i** in  $\text{CDCl}_3$

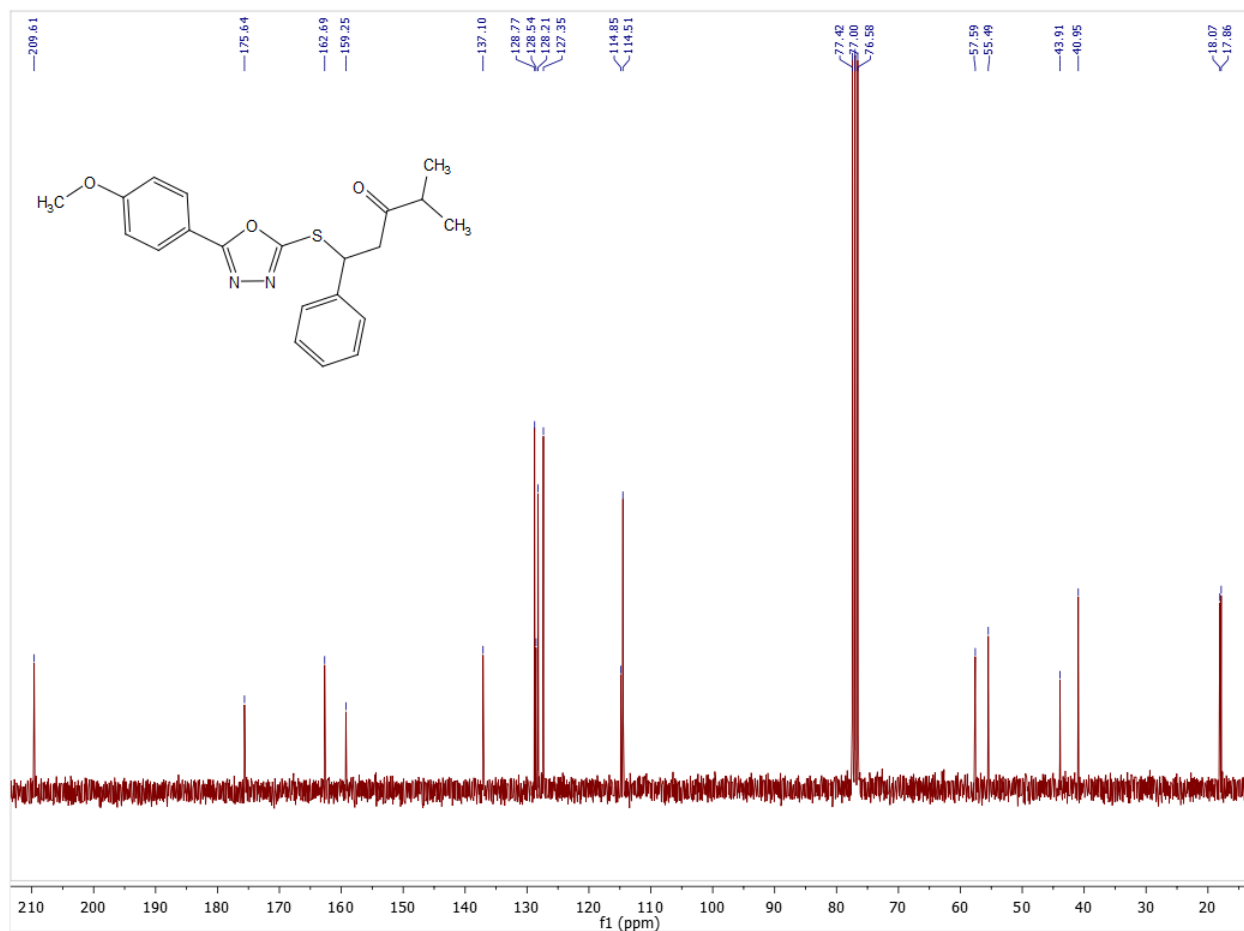

$^{13}\text{C}$  NMR of **7i** in  $\text{CDCl}_3$

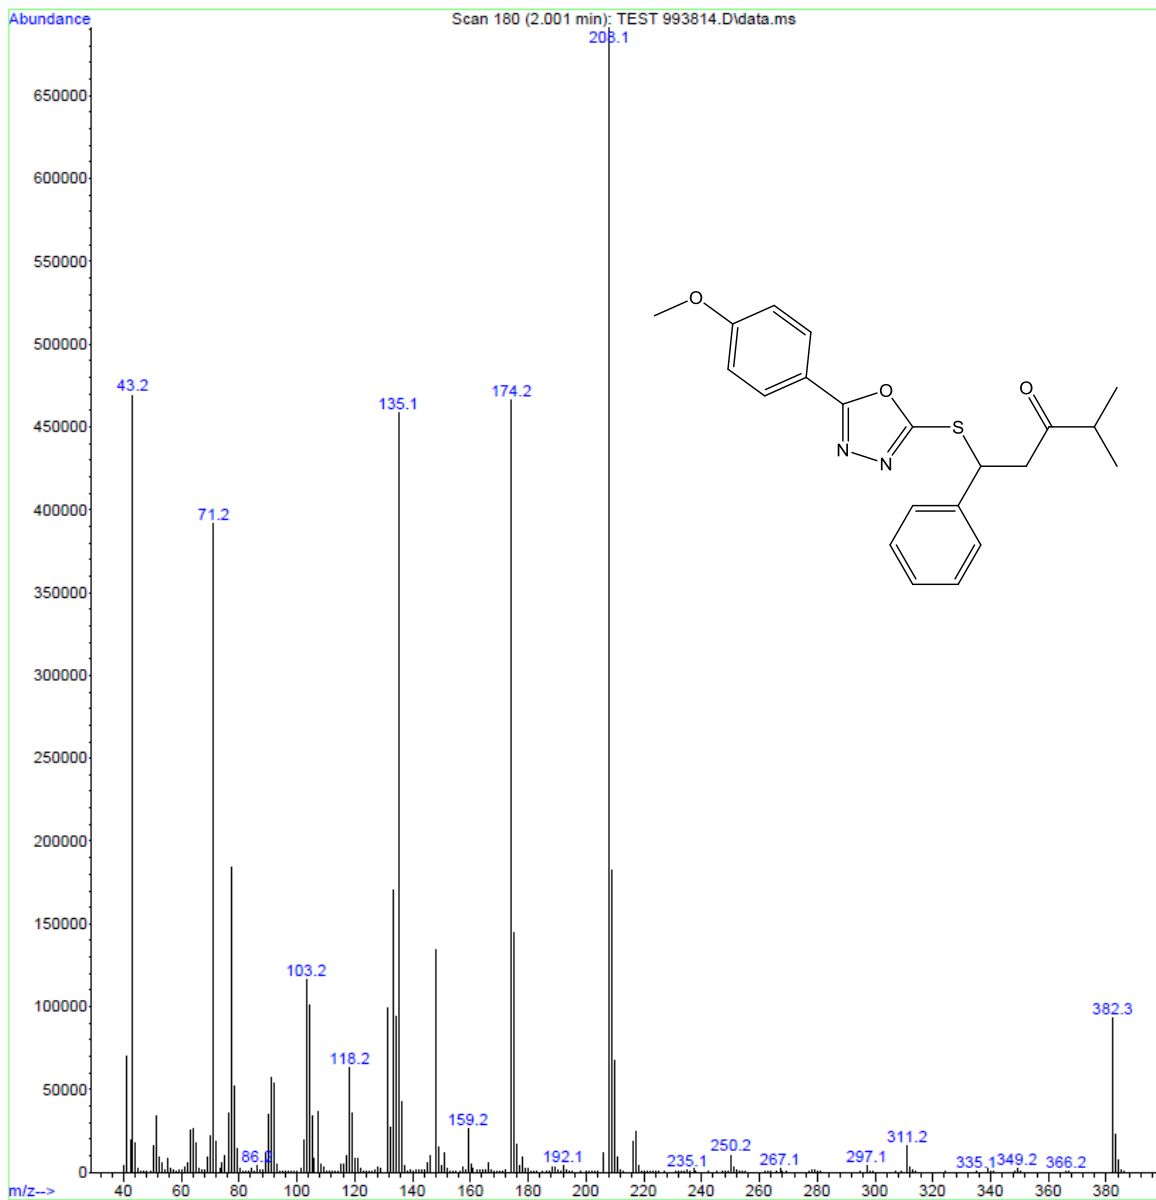

Mass spectrum of **7i**

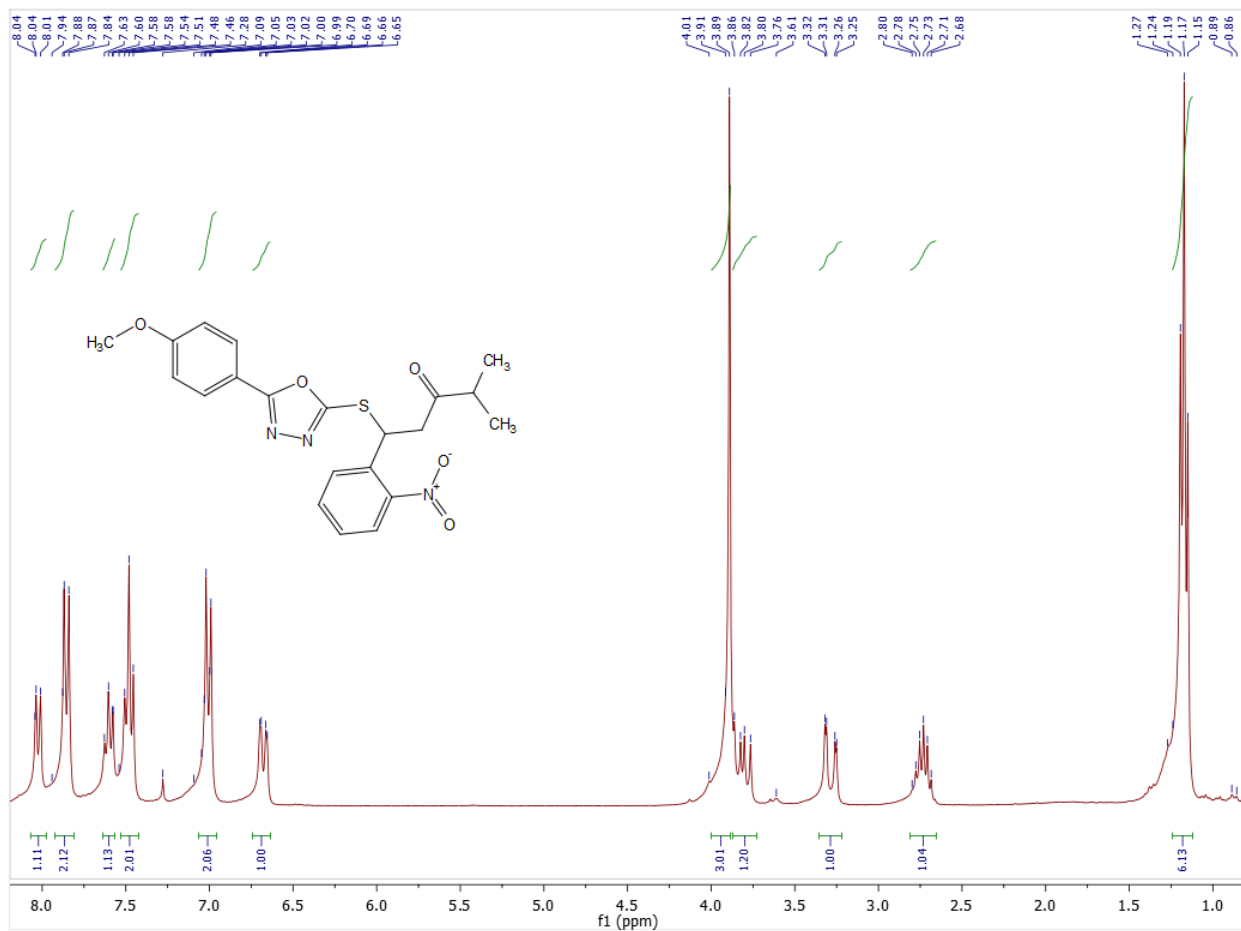

$^1\text{H}$  NMR of **7j** in  $\text{CDCl}_3$

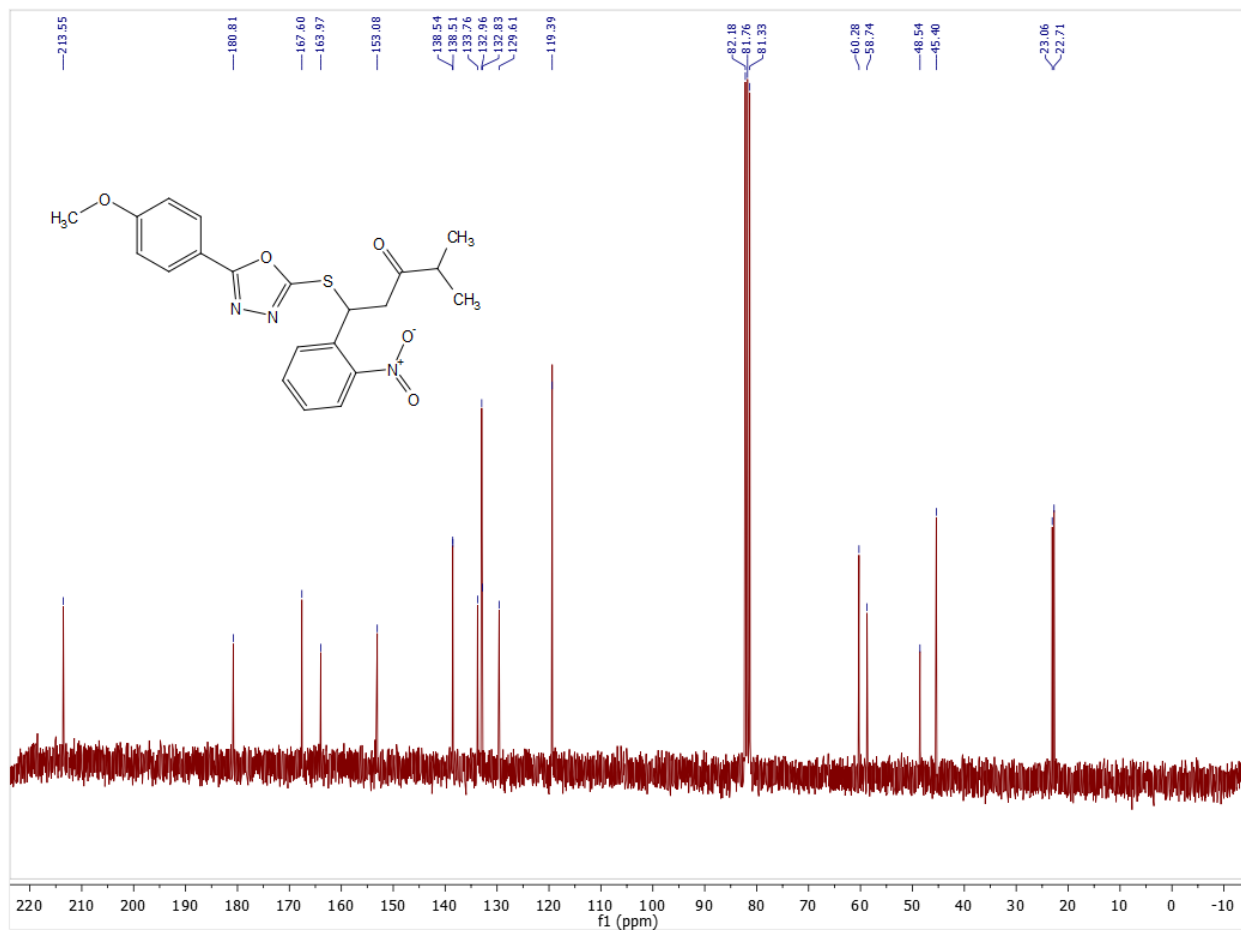

$^{13}\text{C}$  NMR of **7j** in  $\text{CDCl}_3$



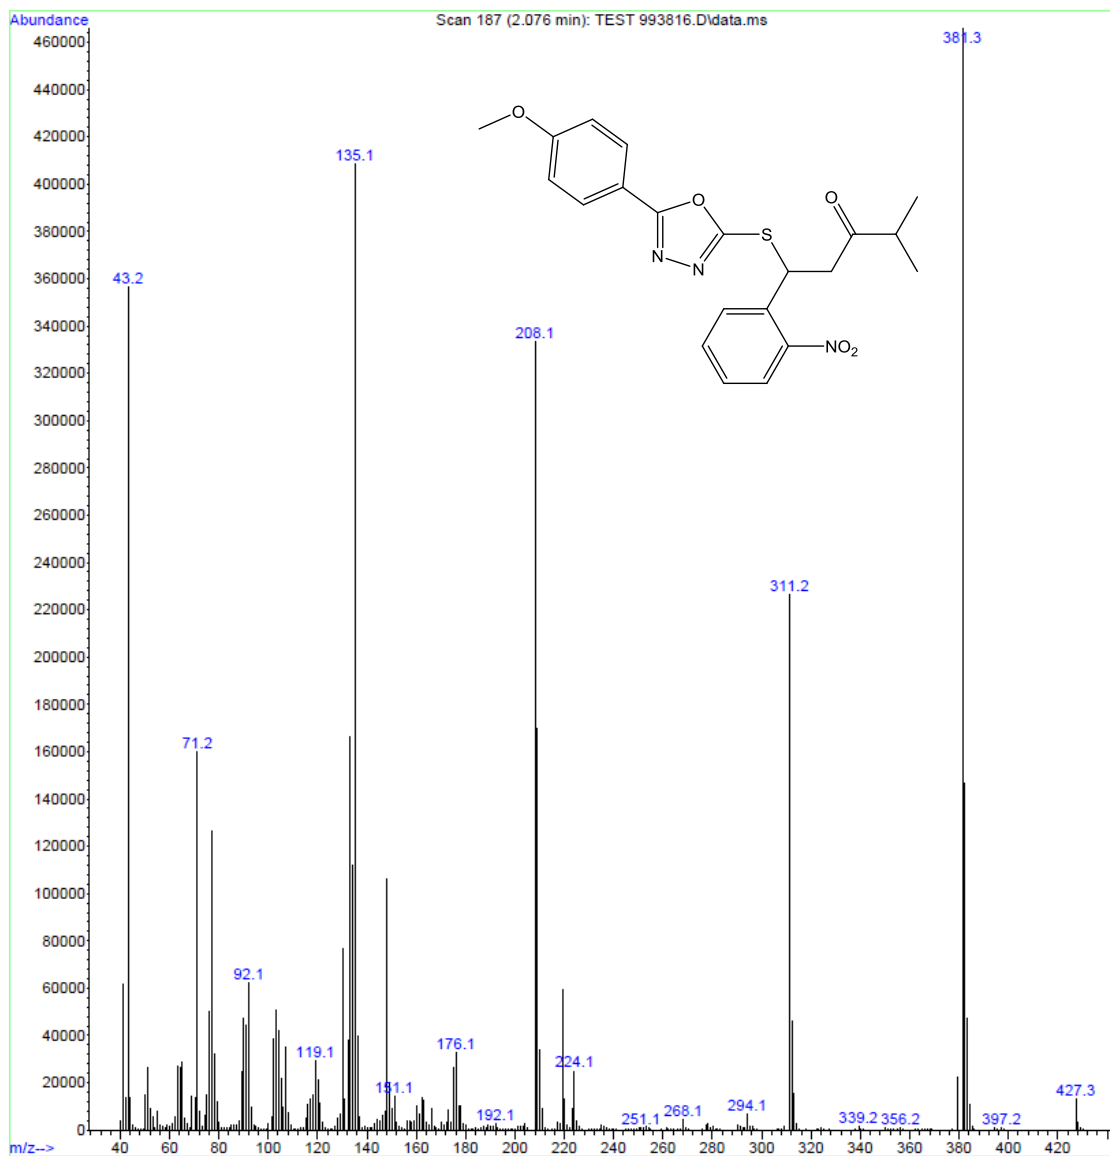

Mass spectrum of **7j**

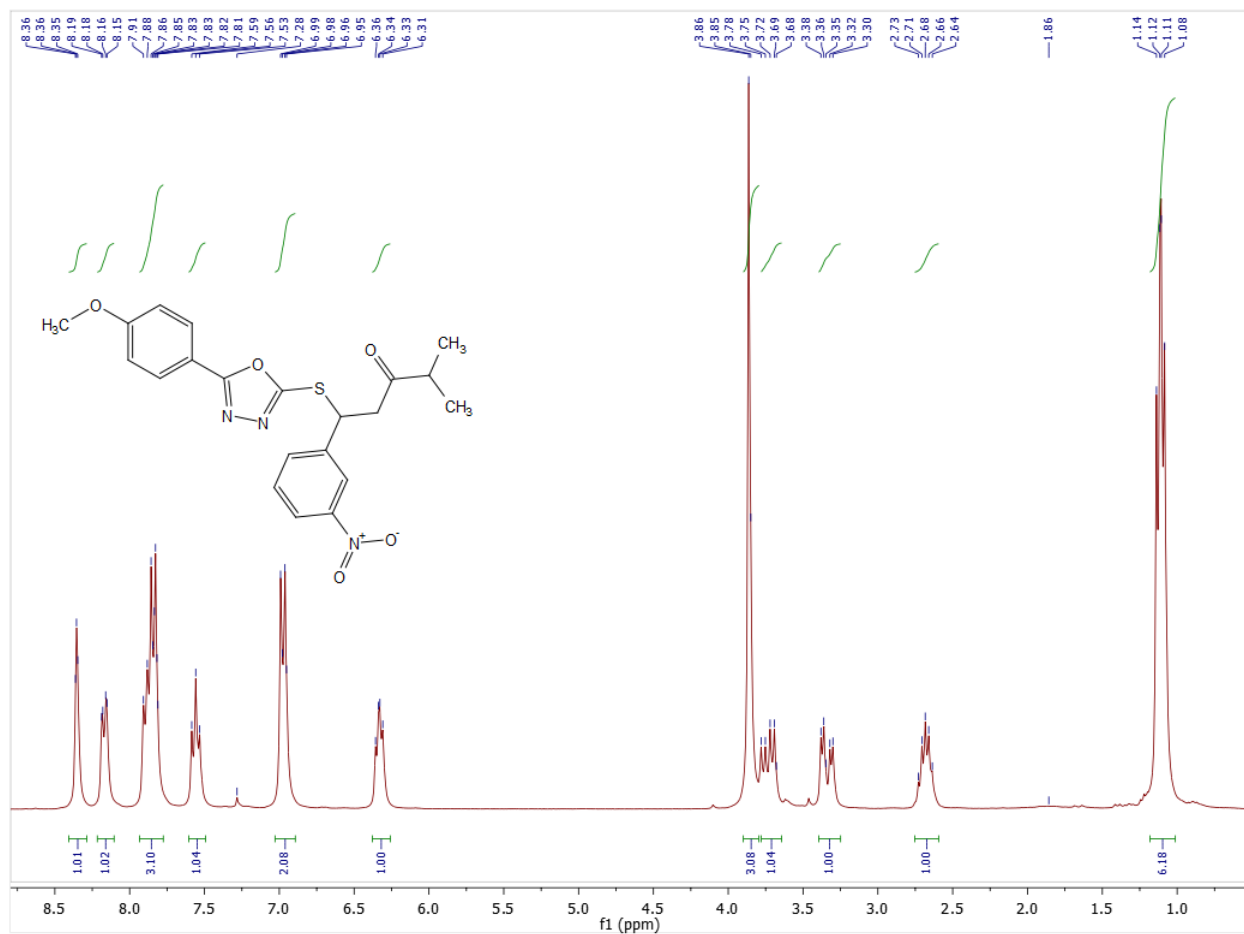

<sup>1</sup>H NMR of **7k** in CDCl<sub>3</sub>

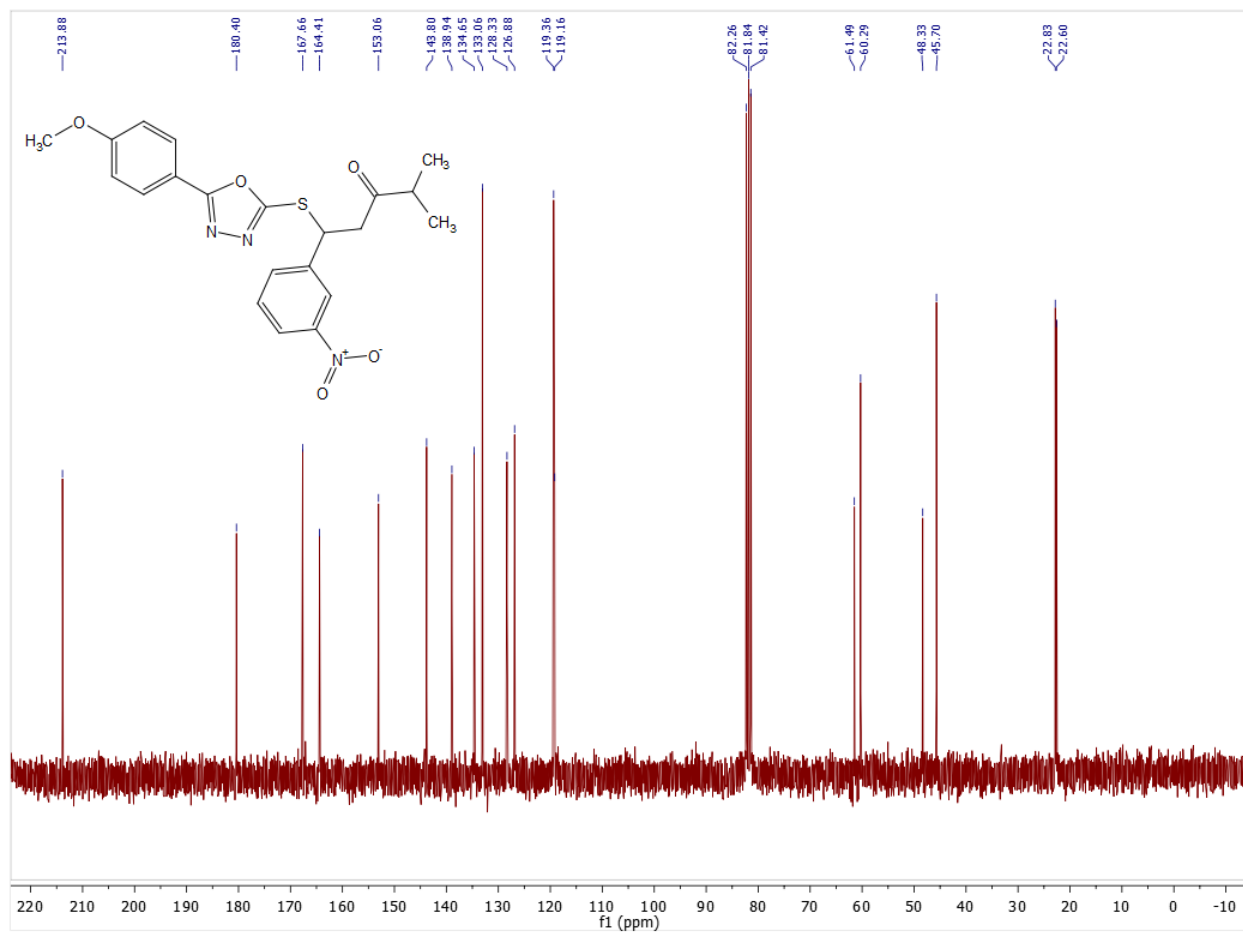

<sup>13</sup>C NMR of **7k** in CDCl<sub>3</sub>

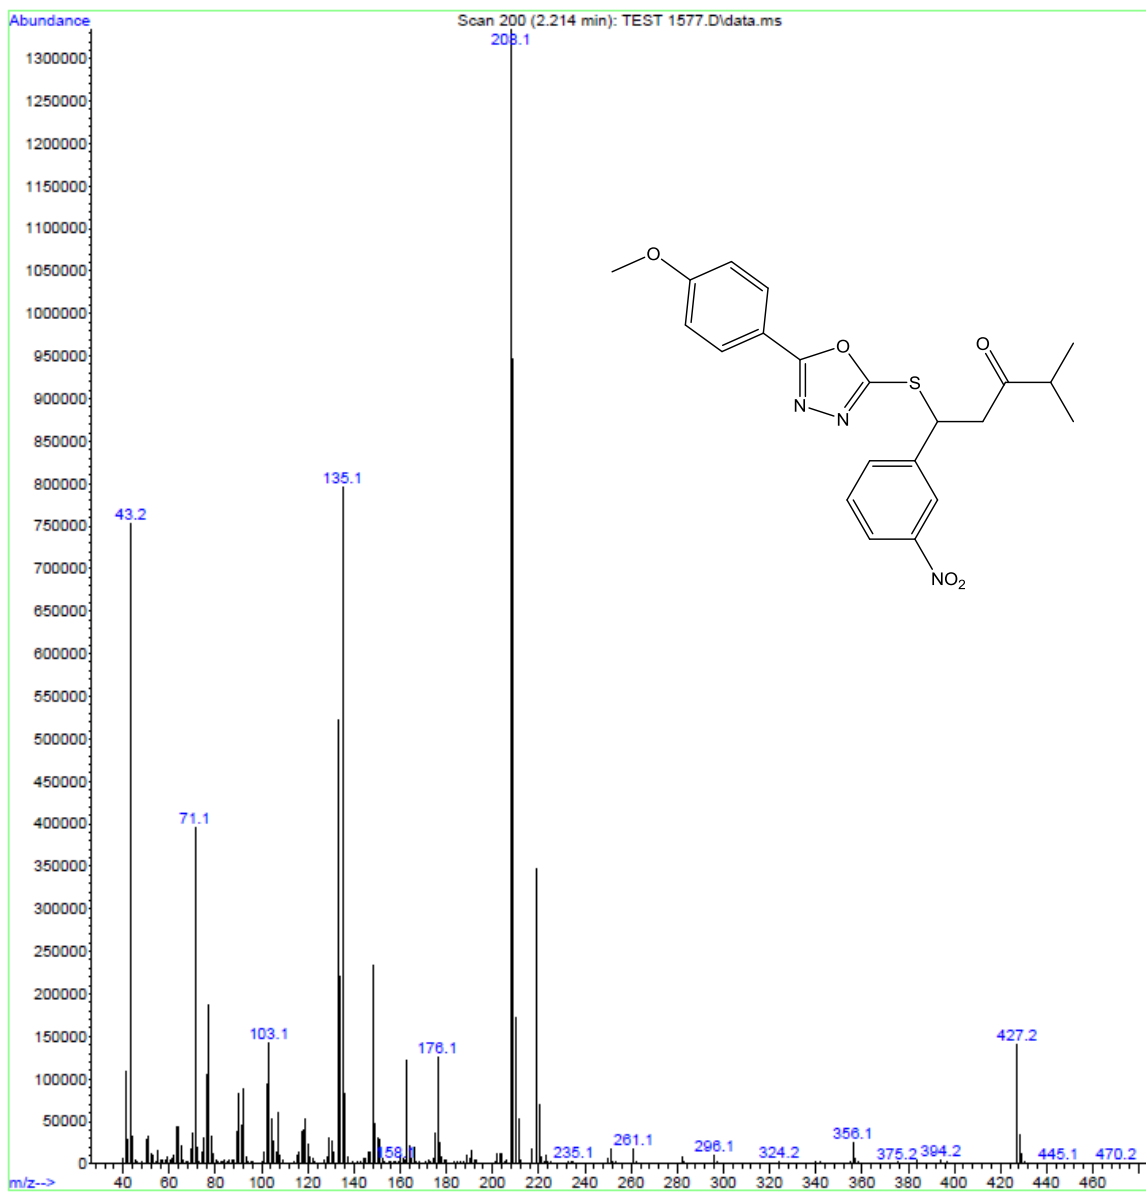

Mass spectrum of **7k**

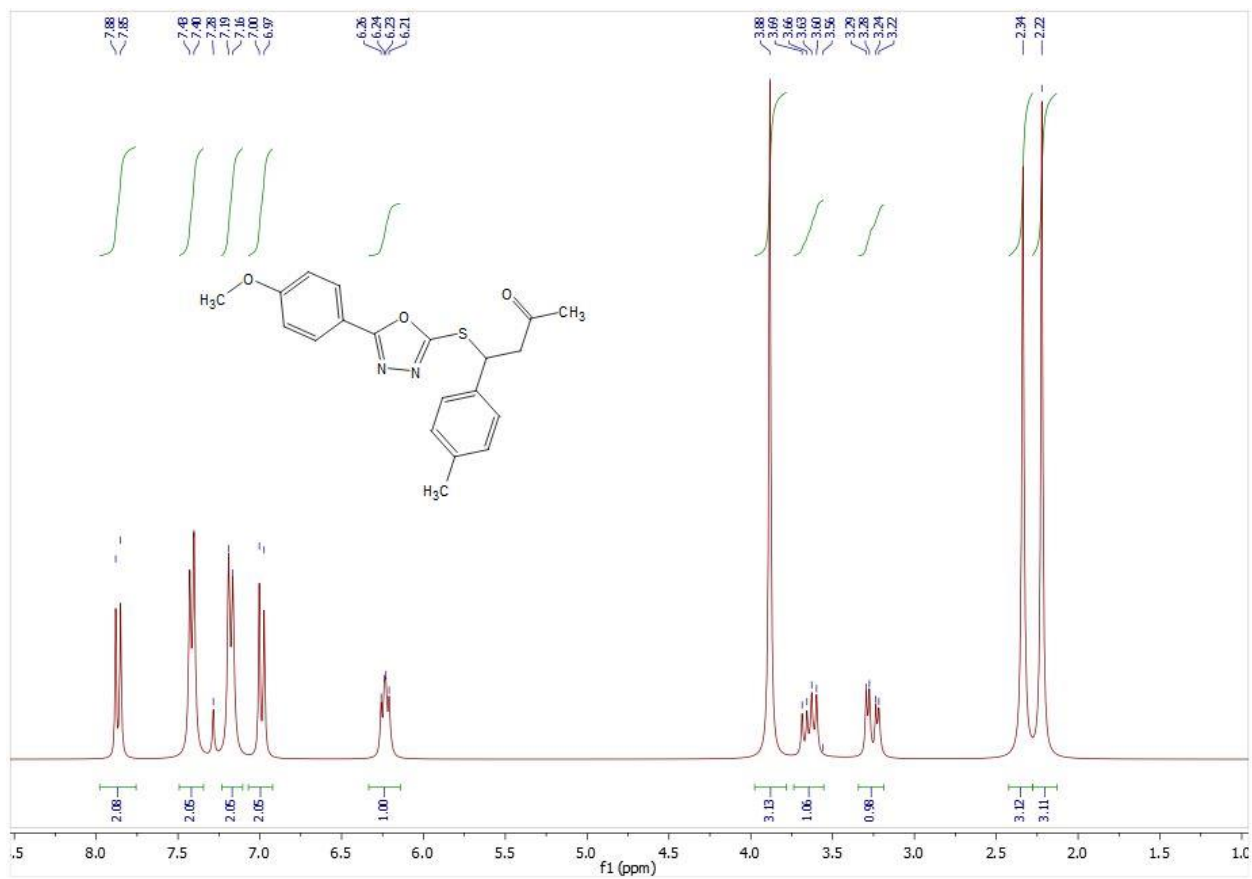

<sup>1</sup>H NMR of **7l** in CDCl<sub>3</sub>

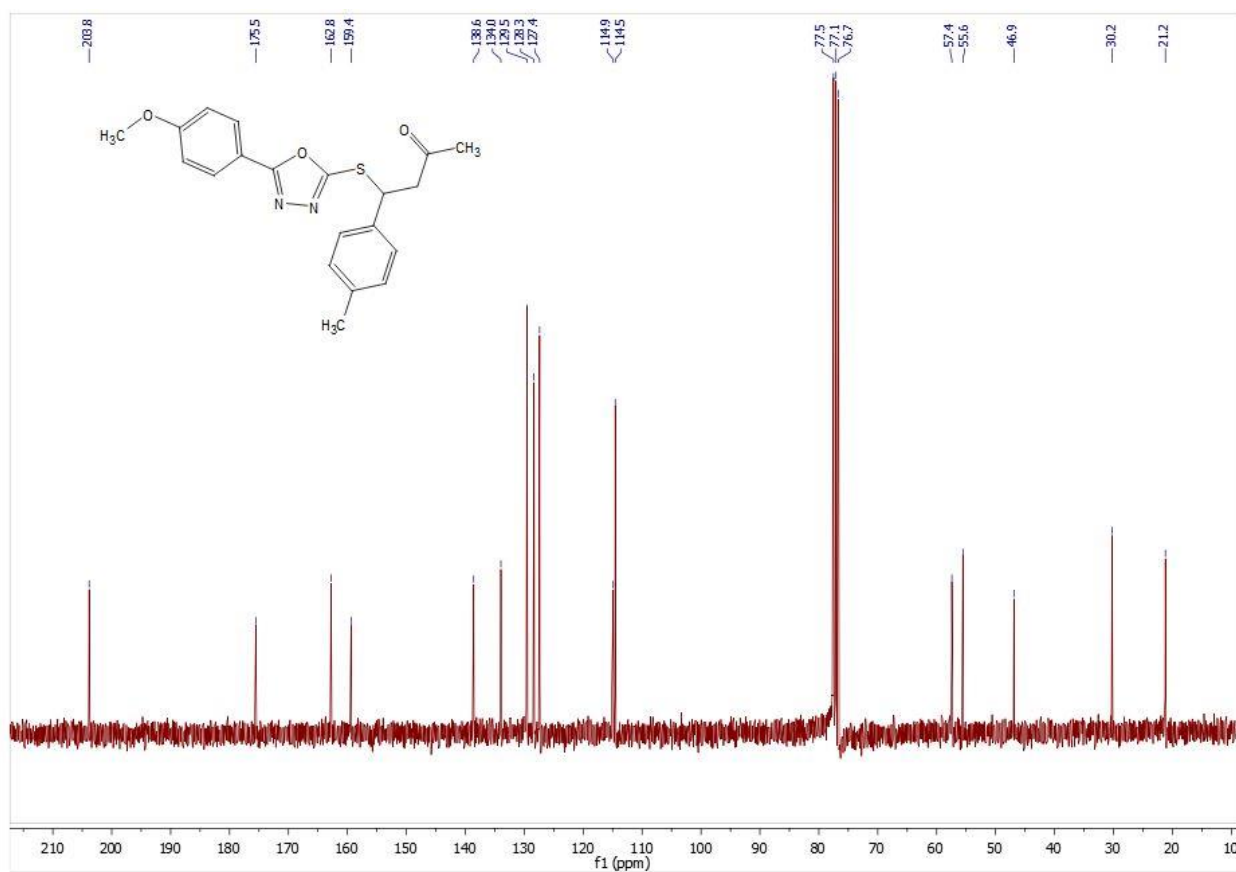

$^{13}\text{C}$  NMR of **71** in  $\text{CDCl}_3$

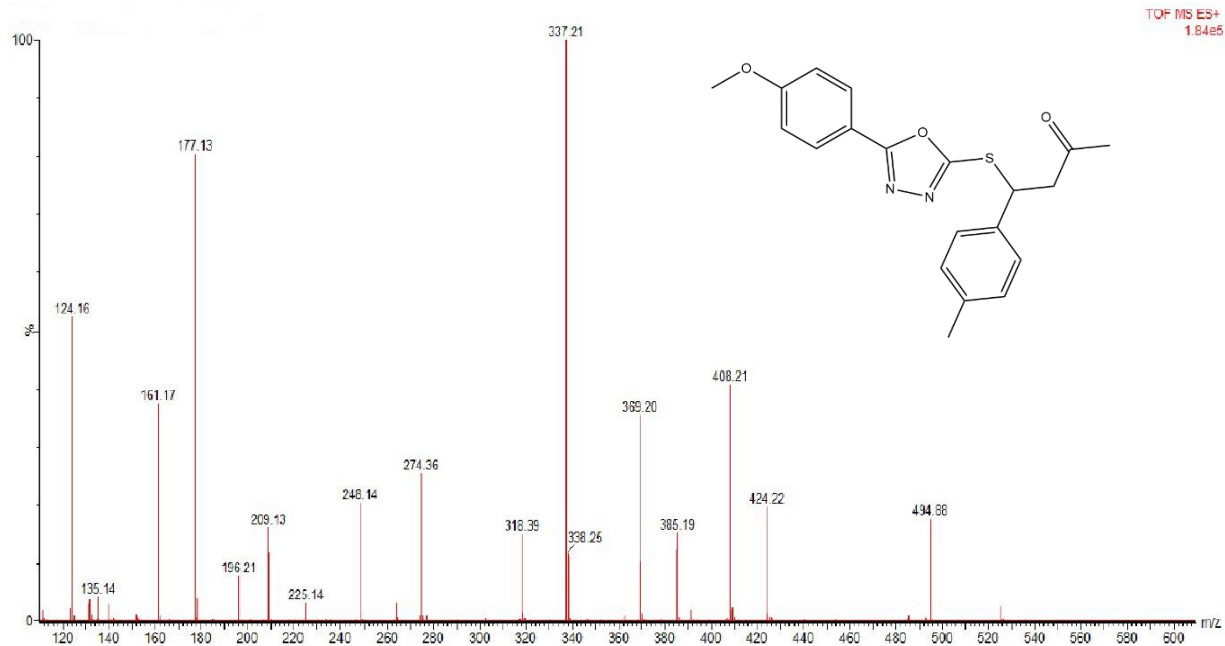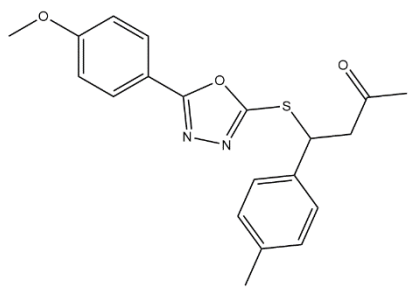

Mass spectrum of **71**

#### 4. References

1. L. Ma, Y. Xiao, C. Li, Z.-L. Xie, D.-D. Li, Y.-T. Wang, H.-T. Ma, H.-L. Zhu, M.-H. Wang and Y.-H. Ye, *Bioorg. Med. Chem.*, 2013, **21**, 6763-6770.
2. H. S. Abd-Ellah, M. Abdel-Aziz, M. E. Shoman, E. A. Beshr, T. S. Kaoud and A.-S. F. Ahmed, *Bioorg. Chem.*, 2016, **69**, 48-63.
3. Z. Chen, W. Xu, K. Liu, S. Yang, H. Fan, P. S. Bhadury, D.-Y. Hu and Y. Zhang, *Molecules*, 2010, **15**, 9046-9056.
4. E. Harder, W. Damm, J. Maple, C. Wu, M. Reboul, J. Y. Xiang, L. Wang, D. Lupyán, M. K. Dahlgren and J. L. Knight, *J. Chem. Theory Comput.*, 2016, **12**, 281-296.
5. R. A. Friesner, R. B. Murphy, M. P. Repasky, L. L. Frye, J. R. Greenwood, T. A. Halgren, P. C. Sanschagrin and D. T. Mainz, *J. Med. Chem.*, 2006, **49**, 6177-6196.
